# Supplementary material for: Ferrocenyl naphthalenes: substituent- and substitution pattern-depending charge transfer studies
Source: Royal Society of Chemistry journal article supplement (doi:10.1039/c9dt03216a), 2019-01-01
Supplement: c9dt03216a1.pdf [file c9dt03216a1.pdf]

Supporting Information

**Ferrocenyl Naphthalenes: Substituent- and Substitution Pattern-depending  
Charge Transfer Studies**

Andrea Preuß,<sup>a</sup> Marcus Korb,<sup>b</sup> Dominique Miesel,<sup>a</sup> Tobias Ruffer,<sup>a</sup> Alexander Hildebrandt<sup>a</sup> and Heinrich Lang<sup>a\*</sup>

a) *Technische Universität Chemnitz, Faculty of Natural Sciences, Institute of Chemistry, Inorganic Chemistry, 09107 Chemnitz, Germany*

b) *Presently, The University of Western Australia, Faculty of Science, School of Molecular Sciences, Crawley, Perth, WA 6009, Australia*

\*Corresponding author: Email: [heinrich.lang@chemie.tu-chemnitz.de](mailto:heinrich.lang@chemie.tu-chemnitz.de); phone: +49(0)371-531-21210; fax.: +49(0)371-531-21219.

Content:

|             |                                                                                                                                 |      |
|-------------|---------------------------------------------------------------------------------------------------------------------------------|------|
| Table SI1   | Crystallographic data for <b>3a–c</b> and <b>3e</b> .                                                                           | pS4  |
| Table SI2   | Crystallographic data for <b>4</b> and <b>6b–d</b> .                                                                            | pS4  |
| Table SI3   | Crystallographic data for <b>7a–d</b> .                                                                                         | pS5  |
| Table SI4   | Selected D-Fe bond lengths, angles and torsion angles of <b>3a–c</b> and <b>3e</b>                                              | pS6  |
| Table SI5   | Selected D-Fe bond lengths, angles and torsion angles of <b>4</b> and <b>6b–d</b>                                               | pS6  |
| Table SI6   | Selected D–Fe bond lengths, angles and torsion angles, and plane intersections ( $^{\circ}/\text{\AA}$ ) of <b>7a–d</b>         | pS6  |
| Scheme SI1  | Numbering scheme of naphthalene core                                                                                            | pS6  |
| Table SI7   | Bond lengths of the naphthalene substituents of <b>3a–c</b> and <b>3e</b>                                                       | pS7  |
| Table SI8   | Bond lengths of the naphthalene substituents of <b>4</b> and <b>6b–d</b>                                                        | pS7  |
| Table SI9   | Bond lengths of the naphthalene substituents of <b>7a–d</b>                                                                     | pS7  |
| Table SI10  | Bond lengths of the naphthalene substituents of <b>7c</b> , <b>8</b> and <b>9</b>                                               | pS8  |
| Table SI11  | RMS deviations of the naphthalene planes of <b>3a–e</b> , <b>4</b> , <b>6b–d</b> and <b>7a–d</b>                                | pS8  |
| Figure SI1  | ORTEP (50 % probability level) of the molecular structures of <b>3a</b> and <b>3b</b>                                           | pS8  |
| Figure SI2  | ORTEP (50 % probability level) of the molecular structure of <b>3e</b>                                                          | pS9  |
| Figure SI3  | ORTEP (50 % probability level) of the molecular structures of <b>6b</b> and <b>6c</b>                                           | pS9  |
| Figure SI4  | ORTEP (50 % probability level) of the molecular structure of <b>6d</b>                                                          | pS10 |
| Figure SI5  | ORTEP (50 % probability level) of the molecular structure of <b>7b</b>                                                          | pS10 |
| Figure SI6  | ORTEP (50 % probability level) of the molecular structure of <b>7c</b>                                                          | pS11 |
| Figure SI7  | ORTEP showing the intermolecular <i>T</i> -shaped $\pi$ -interaction of <b>3b</b>                                               | pS11 |
| Figure SI8  | ORTEP showing the intermolecular <i>T</i> -shaped and parallel displaced $\pi$ -interactions of <b>3c</b>                       | pS12 |
| Figure SI9  | ORTEP showing the intermolecular parallel displaced $\pi$ - $\pi$ interactions of <b>3e</b>                                     | pS12 |
| Figure SI10 | ORTEP showing the intermolecular <i>T</i> -shaped and parallel displaced $\pi$ -interaction of <b>6b</b>                        | pS13 |
| Figure SI11 | ORTEP showing the intermolecular <i>T</i> -shaped $\pi$ -interaction of <b>6d</b>                                               | pS13 |
| Figure SI12 | ORTEP showing the intermolecular <i>T</i> -shaped $\pi$ -interactions of <b>7a</b>                                              | pS14 |
| Figure SI13 | ORTEP showing the intramolecular $\pi$ - $\pi$ interaction of <b>7c</b>                                                         | pS14 |
| Figure SI14 | Cyclic and square wave voltammograms of <b>3a–e</b> and <b>4</b>                                                                | pS15 |
| Figure SI15 | Cyclic and square wave voltammograms of <b>6a–d</b>                                                                             | pS15 |
| Scheme SI2  | Resonance structures of <b>[6a]<sup>+</sup></b> , <b>[6b]<sup>+</sup></b> , <b>[6c]<sup>+</sup></b> and <b>[6d]<sup>+</sup></b> | pS16 |
| Figure SI16 | Cyclic and square wave voltammogram of <b>7c</b> in $[\text{N}^n\text{Bu}_4][\text{PF}_6]$                                      | pS16 |
| Figure SI17 | vis/NIR spectra and deconvolution of <b>3a</b>                                                                                  | pS16 |
| Figure SI18 | UV/vis/NIR spectra of <b>3a</b>                                                                                                 | pS17 |
| Figure SI19 | vis/NIR spectra and deconvolution of <b>3b</b>                                                                                  | pS17 |
| Figure SI20 | UV/vis/NIR spectra of <b>3b</b>                                                                                                 | pS17 |
| Figure SI21 | Deconvolution of the NIR spectra of <b>[3c]<sup>+</sup></b>                                                                     | pS18 |
| Figure SI22 | UV/vis/NIR spectra of <b>3c</b>                                                                                                 | pS18 |
| Figure SI23 | vis/NIR spectra and deconvolution of <b>3d</b>                                                                                  | pS18 |

|             |                                                                |      |
|-------------|----------------------------------------------------------------|------|
| Figure SI24 | UV/vis/NIR spectra of <b>3d</b>                                | pS19 |
| Figure SI25 | vis/NIR spectra and deconvolution of <b>3e</b>                 | pS19 |
| Figure SI26 | UV/vis/NIR spectra of <b>3e</b>                                | pS19 |
| Figure SI27 | vis/NIR spectra and deconvolution of <b>4</b>                  | pS20 |
| Figure SI28 | UV/vis/NIR spectra of <b>4</b>                                 | pS20 |
| Figure SI29 | vis/NIR spectra and deconvolution of <b>6a</b>                 | pS20 |
| Figure SI30 | UV/vis/NIR spectra of <b>6a</b>                                | pS21 |
| Figure SI31 | vis/NIR spectra and deconvolution of <b>6b</b>                 | pS21 |
| Figure SI32 | UV/vis/NIR spectra of <b>6b</b>                                | pS21 |
| Figure SI33 | vis/NIR spectra and deconvolution of <b>6c</b>                 | pS22 |
| Figure SI34 | UV/vis/NIR spectra of <b>6c</b>                                | pS22 |
| Figure SI35 | Deconvolution of the NIR spectra of [ <b>6d</b> ] <sup>+</sup> | pS22 |
| Figure SI36 | UV/vis/NIR spectra of <b>6d</b>                                | pS23 |
| Figure SI37 | vis/NIR spectra and deconvolution of <b>7b</b>                 | pS23 |
| Figure SI38 | UV/vis/NIR spectra of <b>7b</b>                                | pS24 |
| Figure SI39 | vis/NIR spectra and deconvolution of <b>7c</b>                 | pS24 |
| Figure SI40 | UV/vis/NIR spectra of <b>7c</b>                                | pS25 |
| Figure SI41 | UV/vis/NIR spectra of <b>7d</b>                                | pS25 |
| Figure SI42 | <sup>1</sup> H NMR spectrum of <b>3a</b> in CDCl <sub>3</sub>  | pS26 |
| Figure SI43 | <sup>13</sup> C NMR spectrum of <b>3a</b> in CDCl <sub>3</sub> | pS26 |
| Figure SI44 | <sup>1</sup> H NMR spectrum of <b>3b</b> in CDCl <sub>3</sub>  | pS27 |
| Figure SI45 | <sup>13</sup> C NMR spectrum of <b>3b</b> in CDCl <sub>3</sub> | pS27 |
| Figure SI46 | <sup>1</sup> H NMR spectrum of <b>3c</b> in CDCl <sub>3</sub>  | pS28 |
| Figure SI47 | <sup>13</sup> C NMR spectrum of <b>3c</b> in CDCl <sub>3</sub> | pS28 |
| Figure SI48 | <sup>1</sup> H NMR spectrum of <b>6a</b> in CDCl <sub>3</sub>  | pS29 |
| Figure SI49 | <sup>13</sup> C NMR spectrum of <b>6a</b> in CDCl <sub>3</sub> | pS29 |
| Figure SI50 | <sup>1</sup> H NMR spectrum of <b>6b</b> in CDCl <sub>3</sub>  | pS30 |
| Figure SI51 | <sup>13</sup> C NMR spectrum of <b>6b</b> in CDCl <sub>3</sub> | pS30 |
| Figure SI52 | <sup>1</sup> H NMR spectrum of <b>6d</b> in CDCl <sub>3</sub>  | pS31 |
| Figure SI53 | <sup>13</sup> C NMR spectrum of <b>6d</b> in CDCl <sub>3</sub> | pS31 |
| Figure SI54 | <sup>1</sup> H NMR spectrum of <b>7a</b> in CDCl <sub>3</sub>  | pS32 |
| Figure SI55 | <sup>13</sup> C NMR spectrum of <b>7a</b> in CDCl <sub>3</sub> | pS32 |
| Figure SI56 | <sup>1</sup> H NMR spectrum of <b>7d</b> in CDCl <sub>3</sub>  | pS33 |
| Figure SI57 | <sup>13</sup> C NMR spectrum of <b>7d</b> in CDCl <sub>3</sub> | pS33 |

**Table S11.** Crystallographic data for **3a–c** and **3e**.

| Compound                                                       | <b>3a</b>                          | <b>3b</b>                           | <b>3c</b>                          | <b>3e</b>                           |
|----------------------------------------------------------------|------------------------------------|-------------------------------------|------------------------------------|-------------------------------------|
| Empiric formula                                                | C <sub>20</sub> H <sub>16</sub> Fe | C <sub>21</sub> H <sub>18</sub> FeO | C <sub>21</sub> H <sub>18</sub> Fe | C <sub>21</sub> H <sub>16</sub> FeO |
| <i>M<sub>r</sub></i> , g/mol                                   | 312.18                             | 342.20                              | 326.20                             | 340.19                              |
| $\lambda$ , Å                                                  | 0.71073                            | 0.71073                             | 1.54184                            | 1.54184                             |
| Crystal system                                                 | orthorhombic                       | monoclinic                          | monoclinic                         | orthorhombic                        |
| Space group                                                    | <i>Pbca</i>                        | <i>P2<sub>1</sub>/c</i>             | <i>P2<sub>1</sub>/c</i>            | <i>Pna2<sub>1</sub></i>             |
| <i>a</i> , Å                                                   | 20.2076(13)                        | 15.3517(15)                         | 9.662(5)                           | 8.707(10)                           |
| <i>b</i> , Å                                                   | 6.0150(4)                          | 7.3645(7)                           | 10.031(5)                          | 9.473(3)                            |
| <i>c</i> , Å                                                   | 22.725(2)                          | 14.7940(14)                         | 15.390(5)                          | 36.37(3)                            |
| $\alpha$ , deg                                                 | 90                                 | 90                                  | 90                                 | 90                                  |
| $\beta$ , deg                                                  | 90                                 | 115.885(3)                          | 94.773(5)                          | 90                                  |
| $\gamma$ , deg                                                 | 90                                 | 90                                  | 90                                 | 90                                  |
| <i>V</i> , Å <sup>3</sup>                                      | 2762.2(4)                          | 1504.8(3)                           | 1486.4(12)                         | 3000.0(5)                           |
| $\rho_{\text{calcd}}$ mg m <sup>-3</sup>                       | 1.501                              | 1.511                               | 1.458                              | 1.506                               |
| <i>Z</i>                                                       | 8                                  | 4                                   | 4                                  | 8                                   |
| $\mu$ , mm <sup>-1</sup>                                       | 1.080                              | 1.004                               | 8.046                              | 8.054                               |
| <i>T</i> , K                                                   | 114.7(4)                           | 100                                 | 100                                | 121(1)                              |
| $\theta$ range, deg                                            | 3.516 – 24.995                     | 3.761 – 25.000                      | 5.217 – 65.987                     | 4.824 – 64.990                      |
| Measured reflections                                           | 18663                              | 12544                               | 17497                              | 8386                                |
| Independent reflections                                        | 2411                               | 2638                                | 2589                               | 4410                                |
| <i>R</i> <sub>int</sub>                                        | 0.0836                             | 0.0518                              | 0.0360                             | 0.0595                              |
| <i>R</i> <sub>1</sub>                                          | 0.0367                             | 0.0321                              | 0.0270                             | 0.0720                              |
| <i>wR</i> <sub>2</sub> , ( <i>I</i> > 2 $\sigma$ ( <i>I</i> )) | 0.0784                             | 0.0847                              | 0.0682                             | 0.1836                              |
| CCDC no.                                                       | 1897600                            | 1897601                             | 1897602                            | 1897603                             |

**Table S12.** Crystallographic data for **4** and **6b–d**.

| Compound                     | <b>4</b>                           | <b>6b</b>                            | <b>6c</b>                            | <b>6d</b>                            |
|------------------------------|------------------------------------|--------------------------------------|--------------------------------------|--------------------------------------|
| Empiric formula              | C <sub>30</sub> H <sub>22</sub> Fe | C <sub>20</sub> H <sub>15</sub> BrFe | C <sub>20</sub> H <sub>15</sub> BrFe | C <sub>20</sub> H <sub>15</sub> BrFe |
| <i>M<sub>r</sub></i> , g/mol | 438.32                             | 391.08                               | 391.07                               | 391.08                               |
| $\lambda$ , Å                | 0.71073                            | 0.71073                              | 1.54184                              | 0.71073                              |
| Crystal system               | monoclinic                         | monoclinic                           | monoclinic                           | orthorhombic                         |
| Space group                  | <i>C2/c</i>                        | <i>P2<sub>1</sub>/c</i>              | <i>P2<sub>1</sub>/c</i>              | <i>Pbca</i>                          |
| <i>a</i> , Å                 | 12.8866(8)                         | 12.3825(5)                           | 13.8326(7)                           | 10.3319(10)                          |
| <i>b</i> , Å                 | 7.5244(4)                          | 7.7378(4)                            | 11.0072(7)                           | 7.7884(7)                            |
| <i>c</i> , Å                 | 21.0448(17)                        | 15.7332(7)                           | 10.0041(5)                           | 37.581(4)                            |
| $\alpha$ , deg               | 90                                 | 90                                   | 90                                   | 90                                   |
| $\beta$ , deg                | 101.335(7)                         | 93.903(3)                            | 96.575(4)                            | 90                                   |
| $\gamma$ , deg               | 90                                 | 90                                   | 90                                   | 90                                   |

|                                         |                |                |                |                |
|-----------------------------------------|----------------|----------------|----------------|----------------|
| $V, \text{\AA}^3$                       | 2000.8(2)      | 1503.95(12)    | 1513.19(14)    | 3024.1(5)      |
| $\rho_{\text{calcd}} \text{ mg m}^{-3}$ | 1.455          | 1.727          | 1.717          | 1.718          |
| $Z$                                     | 4              | 4              | 4              | 8              |
| $\mu, \text{ mm}^{-1}$                  | 0.769          | 3.652          | 10.999         | 3.632          |
| $T, \text{ K}$                          | 130.00(14)     | 130.00(10)     | 119(4)         | 125(10)        |
| $\theta$ range, deg                     | 3.151 – 25.495 | 2.979 – 26.000 | 5.148 – 62.489 | 2.930 – 24.998 |
| Measured reflections                    | 6221           | 10528          | 4355           | 8085           |
| Independent reflections                 | 6221           | 2950           | 2364           | 2658           |
| $R_{\text{int}}$                        | 0.0538         | 0.0268         | 0.0391         | 0.0648         |
| $R_1$                                   | 0.0751         | 0.0236         | 0.0407         | 0.0475         |
| $wR_2, (I > 2\sigma(I))$                | 0.1498         | 0.0555         | 0.1050         | 0.0781         |
| CCDC no.                                | 1897604        | 1897605        | 1897606        | 1897607        |

**Table S13.** Crystallographic data for **7a–d**.

| Compound                                | <b>7a</b>                               | <b>7b</b>                               | <b>7c</b>                               | <b>7d</b>                               |
|-----------------------------------------|-----------------------------------------|-----------------------------------------|-----------------------------------------|-----------------------------------------|
| Empiric formula                         | $\text{C}_{30}\text{H}_{24}\text{Fe}_2$ | $\text{C}_{30}\text{H}_{24}\text{Fe}_2$ | $\text{C}_{30}\text{H}_{24}\text{Fe}_2$ | $\text{C}_{30}\text{H}_{24}\text{Fe}_2$ |
| $M_r, \text{ g/mol}$                    | 496.19                                  | 496.19                                  | 496.19                                  | 496.19                                  |
| $\lambda, \text{ \AA}$                  | 0.71073                                 | 1.54184                                 | 0.71073                                 | 0.71073                                 |
| Crystal system                          | orthorhombic                            | monoclinic                              | monoclinic                              | monoclinic                              |
| Space group                             | $Pna2_1$                                | $P2_1/n$                                | $P2_1/c$                                | $P2_1/n$                                |
| $a, \text{ \AA}$                        | 12.1550(4)                              | 9.6644(16)                              | 17.0392(7)                              | 13.6264(18)                             |
| $b, \text{ \AA}$                        | 12.9938(3)                              | 10.7292(16)                             | 10.0481(5)                              | 9.7347(13)                              |
| $c, \text{ \AA}$                        | 13.7119(4)                              | 10.9942(18)                             | 12.2011(5)                              | 8.1052(11)                              |
| $\alpha, \text{ deg}$                   | 90                                      | 90                                      | 90                                      | 90                                      |
| $\beta, \text{ deg}$                    | 90                                      | 110.625(18)                             | 92.020(3)                               | 95.977(4)                               |
| $\gamma, \text{ deg}$                   | 90                                      | 90                                      | 90                                      | 90                                      |
| $V, \text{ \AA}^3$                      | 2165.65(11)                             | 1066.9(3)                               | 2087.67(16)                             | 1069.3(2)                               |
| $\rho_{\text{calcd}} \text{ mg m}^{-3}$ | 1.522                                   | 1.545                                   | 1.579                                   | 1.541                                   |
| $Z$                                     | 4                                       | 2                                       | 4                                       | 2                                       |
| $\mu, \text{ mm}^{-1}$                  | 1.356                                   | 11.006                                  | 1.406                                   | 1.373                                   |
| $T, \text{ K}$                          | 129.95(10)                              | 117(10)                                 | 125(10)                                 | 100                                     |
| $\theta$ range, deg                     | 2.971 – 25.999                          | 5.252 – 64.967                          | 3.342 – 24.997                          | 3.498 – 24.991                          |
| Measured reflections                    | 8109                                    | 3123                                    | 10121                                   | 9787                                    |
| Independent reflections                 | 3646                                    | 1782                                    | 3653                                    | 1869                                    |
| $R_{\text{int}}$                        | 0.0269                                  | 0.0690                                  | 0.0225                                  | 0.0744                                  |
| $R_1$                                   | 0.0319                                  | 0.0732                                  | 0.0259                                  | 0.0470                                  |
| $wR_2, (I > 2\sigma(I))$                | 0.0689                                  | 0.1985                                  | 0.0599                                  | 0.1081                                  |
| CCDC no.                                | 1897608                                 | 1897609                                 | 1897610                                 | 1897611                                 |

**Table S14.** Selected D-Fe bond lengths, angles and torsion angles of **3a–c** and **3e**.

|                                                             | <b>3a</b> | <b>3b</b> | <b>3c</b> | <b>3e</b> |
|-------------------------------------------------------------|-----------|-----------|-----------|-----------|
| D1–Fe1 (Å)                                                  |           | 1.6459(3) | 1.6493(7) | 1.646(13) |
| D2–Fe1 (Å)                                                  |           | 1.6489(3) | 1.6524(7) | 1.645(15) |
| D3–Fe2 (Å)                                                  |           |           |           | 1.645(13) |
| D4–Fe2 (Å)                                                  |           |           |           | 1.649(15) |
| D1–Fe1–D2 (°)                                               | 179.72(3) | 178.16(2) | 177.35(2) | 177(3)    |
| D3–Fe2–D4 (°)                                               |           |           |           | 178(3)    |
| C <sub>5</sub> H <sub>4</sub> (D1)–C <sub>6</sub> (C11) (°) | 9.34(12)  | 46.98(9)  | 39.97(7)  | 45.2(5)   |
| C <sub>5</sub> H <sub>4</sub> (D3)–C <sub>6</sub> (C32) (°) |           |           |           | 45.2(5)   |
| C1–D1–D2–C6 (°)                                             |           | –3.87(15) | 0.93(11)  | –0.2(8)   |
| C1–D1–D2–C10 (°)                                            | 5.4 (2)   |           |           |           |
| C22–D3–D4–C27 (°)                                           |           |           |           | 0.6(8)    |

D1 = centroid of C1–C5; D2 = centroid of C6–C10.

**Table S15.** Selected D-Fe bond lengths, angles and torsion angles of **4** and **6b–d**.

|                                                             | <b>4</b>  | <b>6b</b> | <b>6c</b> | <b>6d</b> |
|-------------------------------------------------------------|-----------|-----------|-----------|-----------|
| D1–Fe1 (Å)                                                  | 1.6576(1) | 1.6452(3) | 1.6595(6) | 1.6480(6) |
| D2–Fe1 (Å)                                                  |           | 1.6450(3) | 1.6550(6) | 1.6510(5) |
| D1–Fe1–D2 (°)                                               |           | 177.30(2) | 177.48(4) | 179.53(5) |
| C <sub>5</sub> H <sub>4</sub> (D1)–C <sub>6</sub> (C11) (°) |           | 39.06(7)  | 58.26(16) | 14.9(2)   |
| C <sub>5</sub> H <sub>4</sub> (D1)–C <sub>6</sub> (C6) (°)  | 77.59(19) |           |           |           |
| C1–D1–D2–C6 (°)                                             |           | 2.91(14)  | –10.3(3)  | –11.3(3)  |

D1 = centroid of C1–C5; D2 = centroid of C6–C10; D3 = centroid of C22–C26; D4 = centroid of C27–C31.

**Table S16.** Selected D–Fe bond lengths, angles and torsion angles, and plane intersections (°/Å) of **7a–d**.

|                                                                                          | <b>7a</b> | <b>7b</b> | <b>7c</b>  | <b>7d</b> |
|------------------------------------------------------------------------------------------|-----------|-----------|------------|-----------|
| D1–Fe1 (Å)                                                                               | 1.643(6)  | 1.6433(8) | 1.6537(3)  | 1.6434(5) |
| D2–Fe1 (Å)                                                                               | 1.644(8)  | 1.6469(8) | 1.6507(3)  | 1.6457(5) |
| D3–Fe2 (Å)                                                                               | 1.644(9)  |           | 1.6521(3)  |           |
| D4–Fe2 (Å)                                                                               | 1.650(8)  |           | 1.6512(3)  |           |
| D1–Fe1–D2 (°)                                                                            | 173.2(10) | 179.26(6) | 178.70(2)  | 178.64(4) |
| D3–Fe2–D4 (°)                                                                            | 176.6(10) |           | 178.82(2)  |           |
| C <sub>5</sub> H <sub>4</sub> (D1)–C <sub>6</sub> (C11) (°)                              |           | 46.6(3)   | 40.02(7)   | 6.1(2)    |
| C <sub>5</sub> H <sub>4</sub> (D1)–C <sub>6</sub> (C21) (°)                              | 52.57(15) |           | 37.42(7)   |           |
| C <sub>5</sub> H <sub>4</sub> (D3)–C <sub>6</sub> (C24) (°)                              | 41.62(18) |           |            |           |
| C1–D1–D2–C6 (°)                                                                          | –19(10)   | 6.6(4)    | –15.22(13) | 2.2(3)    |
| C11–D3–D4–C16 (°)                                                                        | 3.9(3)    |           | 3.15(12)   |           |
| C <sub>5</sub> H <sub>4</sub> <sup>A</sup> ...C <sub>5</sub> H <sub>4</sub> <sup>B</sup> | 180.0(4)  | 151.37(6) | 88.82(17)  | 180.0(3)  |

D1 = centroid of C1–C5; D2 = centroid of C6–C10; D3 = centroid of C11–C15; D4 = centroid of C16–C20. A, B = planes of cyclopentadienyls, according to an ascending labeling. The plane intersection is given while considering the orientation of the attached Fe(C<sub>5</sub>H<sub>5</sub>) fragment.

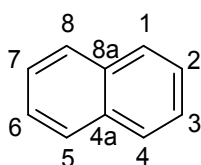**Scheme S11.** Numbering scheme of naphthalene core.

**Table S17.** Bond lengths of the naphthalene substituents of **3a–c** and **3e**.

|             | <b>3a</b> | <b>3b</b> | <b>3c</b> | <b>3e (1)</b> | <b>3e (2)</b> |
|-------------|-----------|-----------|-----------|---------------|---------------|
| C1–C2 (Å)   | 1.374(4)  | 1.387(3)  | 1.391(3)  | 1.397(18)     | 1.396(17)     |
| C2–C3 (Å)   | 1.418(3)  | 1.409(3)  | 1.422(3)  | 1.42(2)       | 1.411(18)     |
| C3–C4 (Å)   | 1.356(4)  | 1.361(3)  | 1.355(3)  | 1.34(2)       | 1.351(19)     |
| C4–C4a (Å)  | 1.417(4)  | 1.408(3)  | 1.412(3)  | 1.427(19)     | 1.422(18)     |
| C4a–C5 (Å)  | 1.414(4)  | 1.417(3)  | 1.413(3)  | 1.397(19)     | 1.422(19)     |
| C4a–C8a (Å) | 1.420(4)  | 1.427(3)  | 1.430(2)  | 1.430(19)     | 1.433(18)     |
| C5–C6 (Å)   | 1.360(4)  | 1.364(3)  | 1.365(3)  | 1.381(19)     | 1.36(2)       |
| C6–C7 (Å)   | 1.409(4)  | 1.404(3)  | 1.409(3)  | 1.41(2)       | 1.40(2)       |
| C7–C8 (Å)   | 1.361(4)  | 1.369(3)  | 1.377(3)  | 1.36(2)       | 1.380(19)     |
| C8–C8a (Å)  | 1.412(4)  | 1.419(3)  | 1.417(3)  | 1.430(18)     | 1.424(17)     |
| C8a–C1 (Å)  | 1.419(4)  | 1.430(3)  | 1.448(3)  | 1.430(18)     | 1.431(18)     |

(1) = the first molecule in the asymmetric unit of **3e**; (2) = the second molecule in the asymmetric unit of **3e**.**Table S18.** Bond lengths of the naphthalene substituents of **4** and **6b–d**.

|             | <b>4</b> | <b>6b</b> | <b>6c</b> | <b>6d</b> |
|-------------|----------|-----------|-----------|-----------|
| C1–C2 (Å)   | 1.369(8) | 1.374(3)  | 1.379(6)  | 1.381(5)  |
| C2–C3 (Å)   | 1.408(8) | 1.411(3)  | 1.421(6)  | 1.426(5)  |
| C3–C4 (Å)   | 1.355(8) | 1.357(3)  | 1.342(6)  | 1.361(6)  |
| C4–C4a (Å)  | 1.414(8) | 1.419(3)  | 1.412(7)  | 1.415(6)  |
| C4a–C5 (Å)  | 1.420(8) | 1.418(3)  | 1.423(7)  | 1.418(6)  |
| C4a–C8a (Å) | 1.432(8) | 1.433(3)  | 1.441(6)  | 1.427(5)  |
| C5–C6 (Å)   | 1.352(9) | 1.359(3)  | 1.349(8)  | 1.365(6)  |
| C6–C7 (Å)   | 1.414(8) | 1.416(3)  | 1.400(7)  | 1.404(5)  |
| C7–C8 (Å)   | 1.369(8) | 1.356(3)  | 1.384(7)  | 1.363(6)  |
| C8–C8a (Å)  | 1.401(8) | 1.422(3)  | 1.425(6)  | 1.409(6)  |
| C8a–C1 (Å)  | 1.440(8) | 1.429(3)  | 1.433(6)  | 1.411(6)  |

**Table S19.** Bond lengths of the naphthalene substituents of **7a–d**.

|             | <b>7a</b> | <b>7b</b> | <b>7c</b> | <b>7d</b> |
|-------------|-----------|-----------|-----------|-----------|
| C1–C2 (Å)   | 1.369(5)  | 1.377(8)  | 1.376(3)  | 1.385(5)  |
| C2–C3 (Å)   | 1.395(6)  | 1.414(8)  | 1.402(3)  | 1.411(5)  |
| C3–C4 (Å)   | 1.373(6)  | 1.356(9)  | 1.355(3)  | 1.362(5)  |
| C4–C4a (Å)  | 1.447(5)  |           | 1.410(3)  |           |
| C4a–C5 (Å)  | 1.419(6)  |           | 1.412(3)  |           |
| C4a–C8a (Å) | 1.420(6)  |           | 1.434(3)  |           |
| C5–C6 (Å)   | 1.361(5)  |           | 1.363(3)  |           |
| C6–C7 (Å)   | 1.393(6)  |           | 1.402(3)  |           |
| C7–C8 (Å)   | 1.361(6)  |           | 1.374(3)  |           |
| C8–C8a (Å)  | 1.418(5)  |           | 1.437(3)  |           |
| C8a–C1 (Å)  | 1.437(5)  | 1.422(8)  | 1.435(2)  | 1.417(5)  |

**Table SI10.** Bond lengths of the naphthalenes substituent of **7c**<sup>[1]</sup>, 1,8-Bis(cobaltocenyl)naphthalene<sup>[2]</sup> (**8**) and 1,8-Bis[( $\eta^5$ -pentamethylcyclopentadienyl)( $\eta^5$ -cyclopentadiendiyl)-nickel(II)]naphthalene<sup>[3]</sup> (**9**).

|             | <b>7c</b> <sup>[1]</sup> | <b>8</b> <sup>[2]</sup> | <b>9</b> <sup>[3]</sup> |
|-------------|--------------------------|-------------------------|-------------------------|
| C1–C2 (Å)   | 1.380                    | 1.389                   | 1.382                   |
| C2–C3 (Å)   | 1.406                    | 1.409                   | 1.407                   |
| C3–C4 (Å)   | 1.341                    | 1.368                   | 1.357                   |
| C4–C4a (Å)  | 1.422                    | 1.419                   | 1.420                   |
| C4a–C5 (Å)  | 1.411                    | 1.422                   | 1.420                   |
| C4a–C8a (Å) | 1.429                    | 1.431                   | 1.427                   |
| C5–C6 (Å)   | 1.353                    | 1.367                   | 1.360                   |
| C6–C7 (Å)   | 1.394                    | 1.411                   | 1.399                   |
| C7–C8 (Å)   | 1.380                    | 1.390                   | 1.379                   |
| C8–C8a (Å)  | 1.437                    | 1.446                   | 1.443                   |
| C8a–C1 (Å)  | 1.443                    | 1.443                   | 1.444                   |

**Table SI11.** RMS (root mean square) deviations of the naphthalene planes of compounds **3a–e**, **6b–d** and **7a–d** and the atom showing the highest displacement ( $d_{\max}$  / Å).\*)

| Compd.             | RMS    | $d_{\max}$       | Compd.             | RMS    | $d_{\max}$                 |
|--------------------|--------|------------------|--------------------|--------|----------------------------|
| <b>3a</b>          | 0.0185 | 0.034(2) C11     | <b>6c</b>          | 0.0893 | 0.150(3) C11               |
| <b>3b</b>          | 0.0466 | 0.0861(16) C11   | C <sub>11–14</sub> | 0.0160 | Angle: 10.9(4)°            |
| C <sub>11–14</sub> | 0.0137 | Angle: 7.23(19)° | C <sub>16–19</sub> | 0.0169 | 0.320(7) Br1 <sup>a)</sup> |
| C <sub>16–19</sub> | 0.0078 |                  | <b>6d</b>          | 0.0242 | 0.037(3) C2                |
| <b>3c</b>          | 0.0138 | 0.0257(14) C14   | <b>7a</b>          | 0.0156 | 0.026(3) C23               |
| <b>3e</b>          | 0.0321 | 0.065(10) C11    | <b>7b</b>          | 0.0182 | 0.020(4) C11               |
|                    | 0.0290 | 0.067(10) C32    | <b>7c</b>          | 0.1136 | 0.1894(14) C1              |
| <b>4</b>           | 0.0125 | 0.021(5) C6      | C <sub>1–4</sub>   | 0.0163 | Angle: 15.54(14)           |
| <b>6b</b>          | 0.0247 | 0.0349(18) C18   | C <sub>6–9</sub>   | 0.0191 | 0.007(3) C14               |
|                    |        |                  | <b>7d</b>          | 0.0350 |                            |

\*) The values were calculated by using WinGX. <sup>a)</sup> Deviation towards the C16–C19 plane.

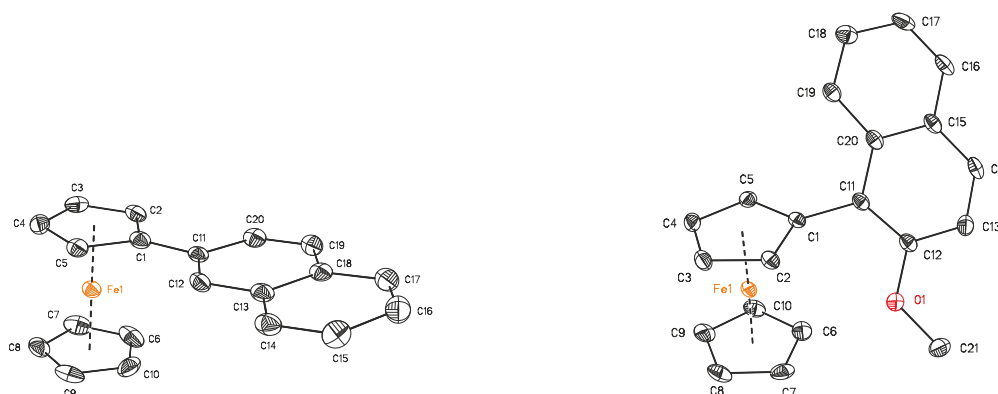

**Figure SI1.** ORTEP (50 % probability level) of the molecular structures of **3a** (left) and **3b** (right) with the atom-numbering scheme. All hydrogen atoms have been omitted for clarity. Selected bond distances (Å), angles (deg), and torsion angles (deg): **3a**, C1–C11 = 1.471(4), C2–C1–C11 = 126.6(2), C5–C1–C11 = 126.6(2), C11–C1–C2–C3 = -175.1(2), C11–C1–C5–C4 = 174.9(2), C2–C1–C11–C12 = 178.0(2), C5–C1–C11–C12 = 2.9(4), C1–C11–C12–C13 = -173.7(2), C5–C1–C11–C20 = -173.0(2), C2–C1–C11–C20 = 2.1(4); **3b**, C1–C11 = 1.477(3), C12–O1 = 1.367(3), C21–O1 = 1.426(3), C2–C1–C11 = 128.02(19), C5–C1–C11 = 125.43(19), C12–O1–C21 = 118.33(17), C11–C1–C2–C3 = 174.39(19), C11–C1–C5–C4 = -174.71(19), C2–C1–C11–C12 = 48.7(3), C5–C1–C11–C12 = -135.9(2), C1–C11–C12–C13 = 172.24(19), C5–C1–C11–C20 = 45.5(3), C2–C1–C11–C20 = -129.9(2), C11–C12–O1–C21 = -10.2(3).



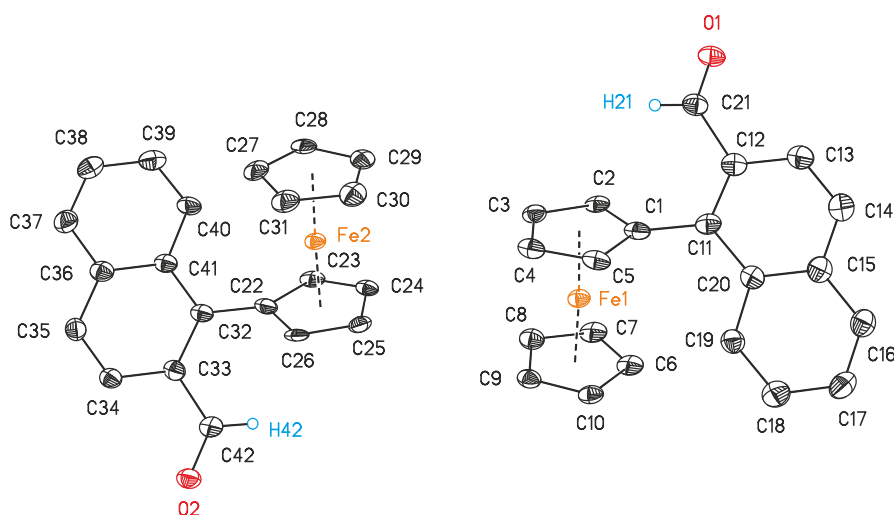

**Figure S12.** ORTEP (50 % probability level) of the molecular structure of **3e** with the atom-numbering scheme. All hydrogen atoms have been omitted for clarity. Selected bond distances (Å), angles (deg), and torsion angles (deg): C1–C11 = 1.480(18), C22–C32 = 1.458(18), C21–O1 = 1.214(16), C21–H21 = 0.9300, C42–O2 = 1.234(15), C42–H42 = 0.9300, C5–C1–C11 = 129.2(12), C2–C1–C11 = 123.5(11), O1–C21–C12 = 124.7(13), O1–C21–H21 = 117.7, C12–C21–H21 = 117.7, C23–C22–C32 = 131.1(12), C26–C22–C32 = 123.2(11), O2–C42–C33 = 123.4(11), O2–C42–H42 = 118.3, C33–C42–H42 = 118.3, C11–C1–C2–C3 = –174.3(11), C11–C1–C5–C4 = 173.9(12), C2–C1–C11–C12 = 40.9(18), C5–C1–C11–C12 = –133.9(13), C1–C11–C12–C13 = –170.7(12), C5–C1–C11–C20 = 50.4(19), C2–C1–C11–C20 = –134.8(13), C32–C22–C23–C24 = –175.8(12), C32–C22–C26–C25 = 174.8(11), C23–C22–C32–C33 = 131.6(13), C26–C22–C32–C33 = –41.6(17), C22–C32–C33–C34 = 170.6(11), C26–C22–C32–C41 = 135.7(12), C23–C22–C32–C41 = –51.1(19), C11–C12–C21–O1 = –168.1(12), C13–C12–C21–O1 = 17.6(19), C32–C33–C42–O2 = 168.9(12), C34–C33–C42–O2 = –15.1(18).

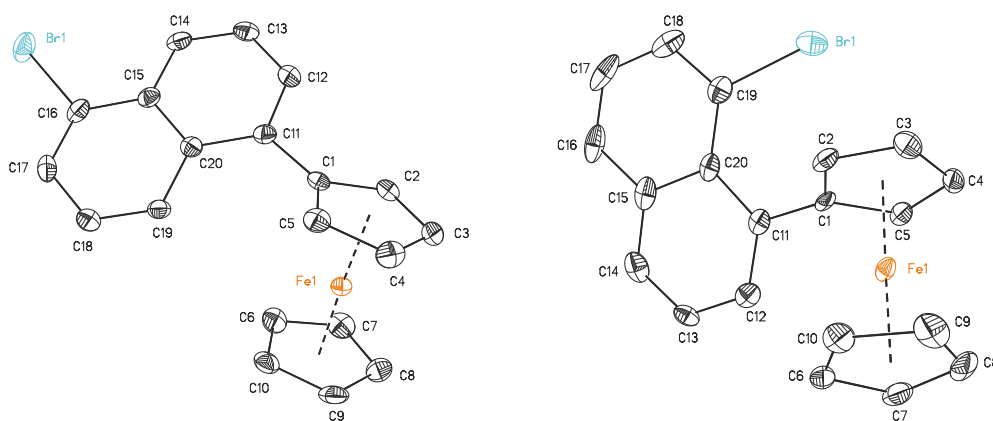

**Figure S13.** ORTEP (50 % probability level) of the molecular structures of **6b** (left) and **6c** (right) with the atom-numbering scheme. All hydrogen atoms have been omitted for clarity. Selected bond distances (Å), angles (deg), and torsion angles (deg): **6b**, C1–C11 = 1.488(3), C16–Br1 = 1.911(2), C2–C1–C11 = 124.02(18), C5–C1–C11 = 129.04(18), C17–C16–Br1 = 117.84(16), C15–C16–Br1 = 118.71(15), C11–C1–C2–C3 = 172.64(18), C11–C1–C5–C4 = –172.22(19), C2–C1–C11–C12 = –34.8(3), C5–C1–C11–C12 = 136.6(2), C1–C11–C12–C13 = –178.1(2), C5–C1–C11–C20 = –40.8(3), C2–C1–C11–C20 = 147.8(2), C14–C15–C16–Br1 = –4.3(3), C20–C15–C16–Br1 = 177.33(14), Br1–C16–C17–C18 = –178.85(16); **6c**, C1–C11 = 1.490(5), C19–Br1 = 1.908(4), C2–C1–C11 = 126.1(3), C5–C1–C11 = 126.1(3), C18–C19–Br1 = 113.8(3), C20–C19–Br1 = 122.9(3), C11–C1–C2–C3 = –176.6(4), C11–C1–C5–C4 = 177.0(4), C2–C1–C11–C12 = –120.5(4), C5–C1–C11–C12 = 62.3(5), C1–C11–C12–C13 = 173.2(3), C5–C1–C11–C20 = –119.8(4), C2–C1–C11–C20 = 57.4(5), C17–C18–C19–Br1 = 171.3(3), Br1–C19–C20–C15 = –163.8(3), Br1–C19–C20–C11 = 13.6(6).

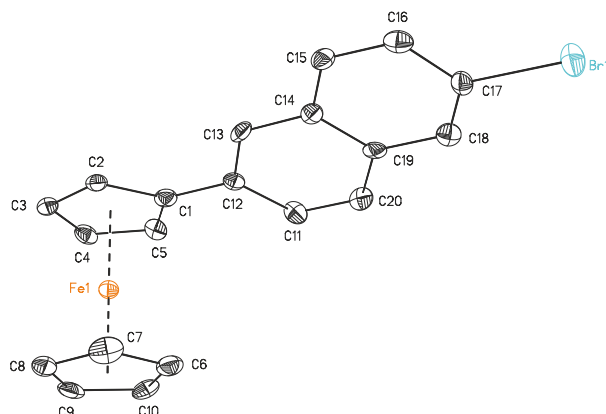

**Figure S14.** ORTEP (50 % probability level) of the molecular structure of **6d** with the atom-numbering scheme. All hydrogen atoms have been omitted for clarity. Selected bond distances (Å), angles (deg), and torsion angles (deg): **6d**, C1–C12 = 1.469(6), C17–Br1 = 1.902(4), C2–C1–C11 = 125.9(4), C5–C1–C11 = 127.1(4), C18–C17–Br1 = 118.6(3), C16–C17–Br1 = 119.1(3), C12–C1–C2–C3 = 179.9(4), C12–C1–C5–C4 = 179.9(4), C11–C12–C1–C2 = –15.1(6), C11–C12–C1–C5 = 164.9(4), C13–C12–C1–C5 = –14.7(6), C13–C12–C1–C2 = 165.4(4), C20–C11–C12–C1 = 178.7(4), C1–C11–C12–C13 = –178.1(2), C15–C16–C17–Br1 = 179.0(3), Br1–C17–C18–C19 = –179.5(3).

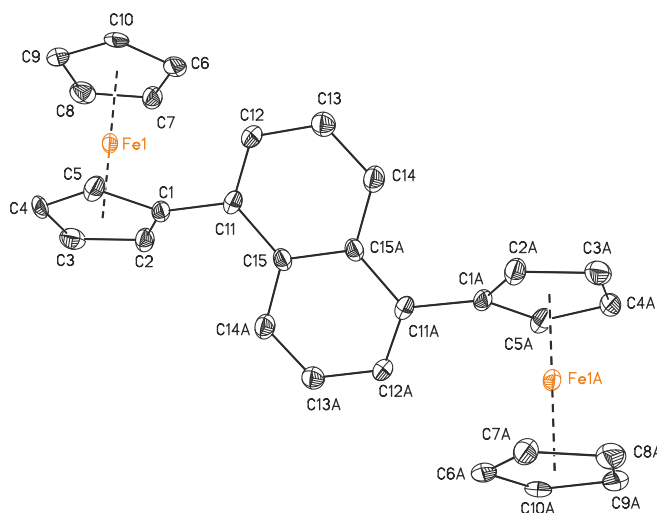

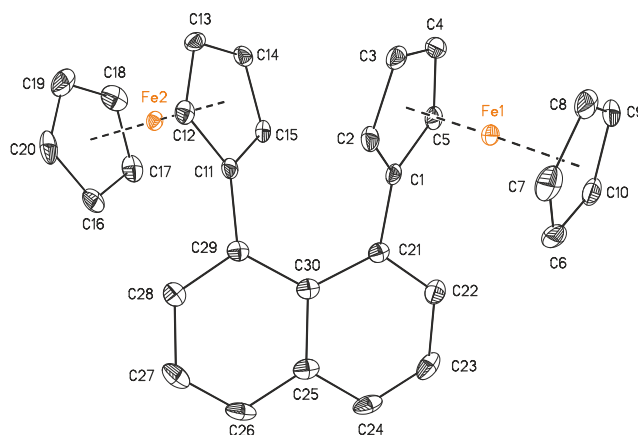

**Figure S16.** ORTEP (50 % probability level) of the molecular structure of **7c** with the atom-numbering scheme. All hydrogen atoms have been omitted for clarity. Selected bond distances (Å) and angles (°): C1–C21 = 1.483(3), C11–C29 = 1.481(3), C2–C1–C21 = 126.49(16), C5–C1–C21 = 126.69(16), C30–C21–C1 = 121.86(16), C22–C21–C1 = 119.02(16), C15–C11–C29 = 127.51(16), C12–C11–C29 = 125.46(16), C28–C29–C11 = 119.18(17), C30–C29–C11 = 121.68(16), C21–C1–C2–C3 = –179.72(17), C21–C1–C5–C4 = 179.59(17), C2–C1–C21–C22 = –132.96(19), C5–C1–C21–C22 = 45.7(3), C1–C21–C22–C23 = 169.75(17), C5–C1–C21–C30 = –139.50(18), C2–C1–C21–C30 = 41.9(3), C1–C21–C30–C29 = 19.0(3), C(11)–C(29)–C(30)–C(25) = –161.93(16), C(11)–C(29)–C(30)–C(21) = 17.9(3), C(28)–C(29)–C(11)–C(12) = 43.1(3), C(30)–C(29)–C(11)–C(12) = –141.67(18), C(28)–C(29)–C(11)–C(15) = –135.72(19), C(30)–C(29)–C(11)–C(15) = 39.5(3), C(29)–C(11)–C(15)–C(14) = –179.29(16), C(29)–C(11)–C(12)–C(13) = 179.46(17).

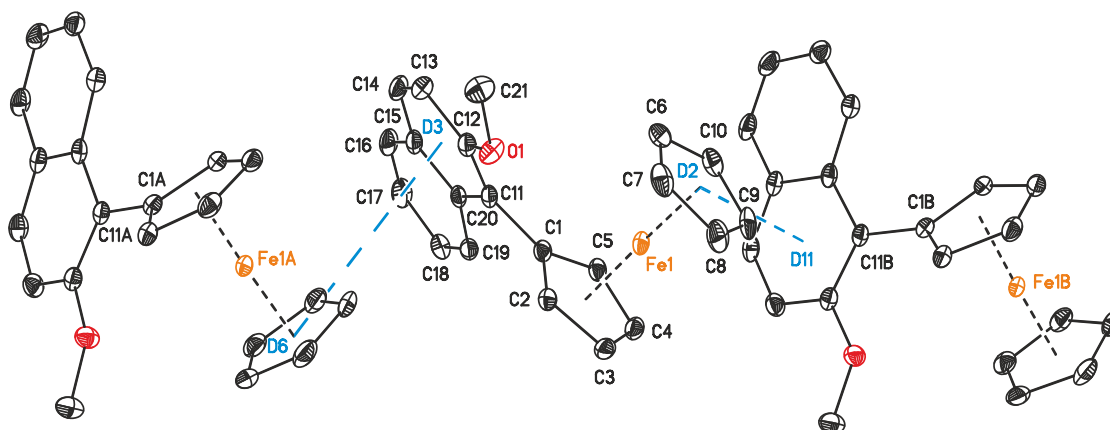

| Ct ... D | d (Å)     | $\alpha$ (°) |
|----------|-----------|--------------|
|          | 4.721(16) | 85.79(12)    |

**Figure S17.** ORTEP (50 % probability level) of the molecular structure of **3b** with selected atom-numbering scheme, showing the intermolecular *T*-shaped  $\pi$ -interaction (blue dashed lines) between the C<sub>5</sub>H<sub>5</sub> unit and the C<sub>6</sub>H<sub>4</sub> moiety (including C11 to C20). Only a section of different  $\pi$ - $\pi$  interaction pattern is shown and all hydrogen atoms have been omitted for clarity. (Symmetry code for generating-equivalent atoms; A:  $x, 3/2-y, -1/2+z$ ; B:  $x, 3/2-y, 1/2+z$ ).

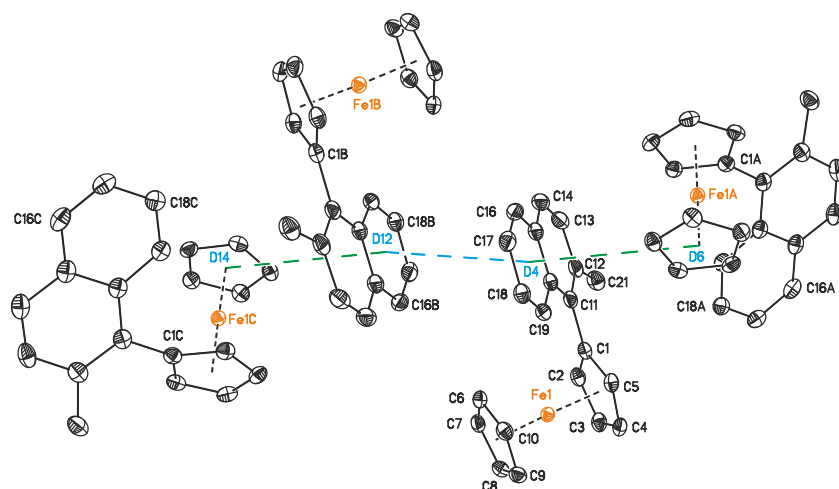

|             | d (Å)    | $\alpha$ (°) |
|-------------|----------|--------------|
| Ct ... D    | 4.576(3) | 88.28(9)     |
| D ... D     | 3.860(2) | 0            |
| C16 ... C18 | 3.399(3) |              |

**Figure S18.** ORTEP (50 % probability level) of the molecular structure of **3c** with selected atom-numbering scheme, showing the intermolecular T-shaped  $\pi$ -interaction (green dashed lines) between the  $C_5H_5$  unit and the  $C_6H_4$  moiety (including C16 and C18) and parallel displaced pattern (blue dashed lines) between the  $C_6H_4$  moieties (including C16 and C18). Only a section of different  $\pi$ - $\pi$  interaction pattern is shown and all hydrogen atoms have been omitted for clarity. (Symmetry code for generating-equivalent atoms; A:  $-1/2+x, 1/2+y, 3/2-z$ ; B:  $-1+x, -y, 1-z$ ; C:  $-1/2+x, 1/2-y, -1/2+z$ ).

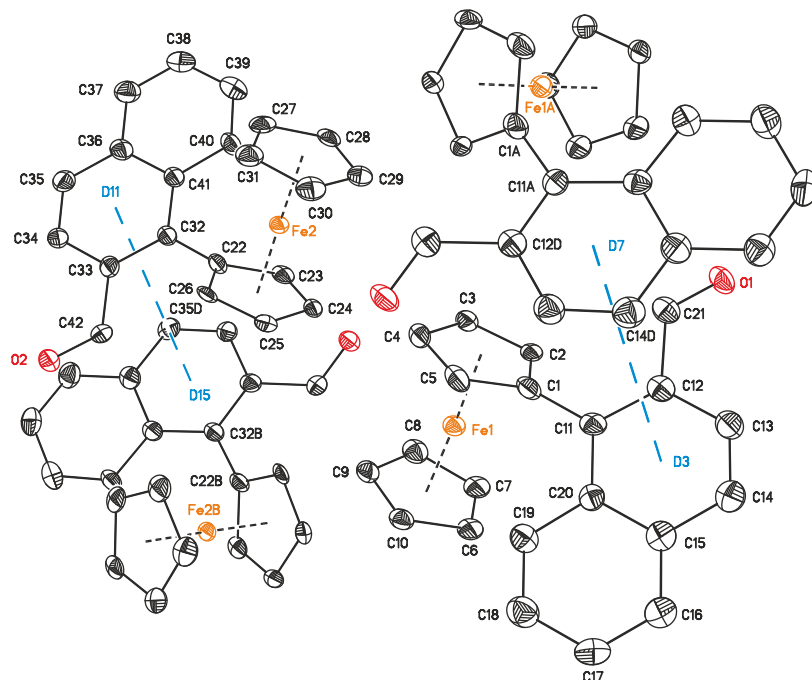

|             | d (Å)     | $\alpha$ (°) |
|-------------|-----------|--------------|
| D ... D     | 4.488(9)  | 2            |
| D ... D     | 4.475(9)  | 1            |
| C12 ... C14 | 3.486(18) |              |
| C32 ... C35 | 3.660(18) |              |

**Figure S19.** ORTEP (50 % probability level) of the molecular structure of **3e** with selected atom-numbering scheme, showing the intermolecular parallel displaced  $\pi$ -interaction (blue dashed lines)

between the naphthalene moieties (including C11 to C20 and C32 to C41) forming dimers. All hydrogen atoms have been omitted for clarity. (Symmetry code for generating-equivalent atoms; A:  $x+1/2, 3/2-y, z$ ; B:  $x+1/2, 3/2-y, z$ ).

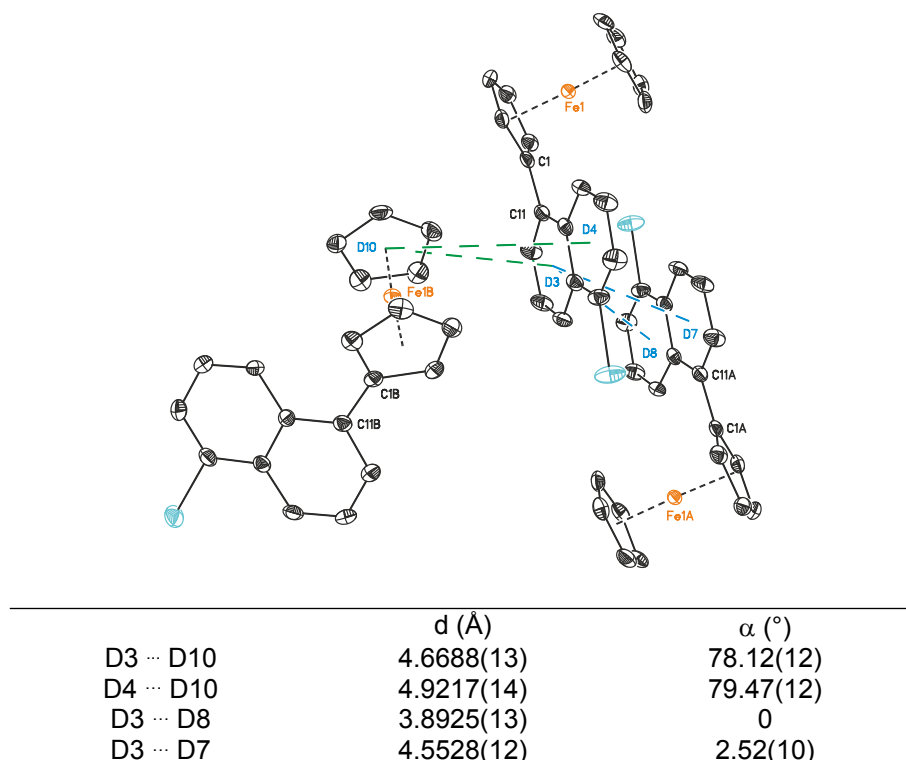

**Figure S110.** ORTEP (50 % probability level) of the molecular structure of **6b** with selected atom-numbering scheme, showing the intermolecular *T*-shaped  $\pi$ -interaction (green dashed lines) between the  $C_5H_5$  unit and the  $C_6H_4$  moiety (including C11 to C20) and parallel displaced pattern (blue dashed lines) between the  $C_6H_4$  moieties (including C11 to C20 and C15 to C20). Only a section of different  $\pi$ - $\pi$  interaction pattern is shown and all hydrogen atoms have been omitted for clarity. (Symmetry code for generating-equivalent atoms; A:  $2-x, 1-y, 2-z$ ; B:  $x, 3/2-y, 1/2-z$ ).

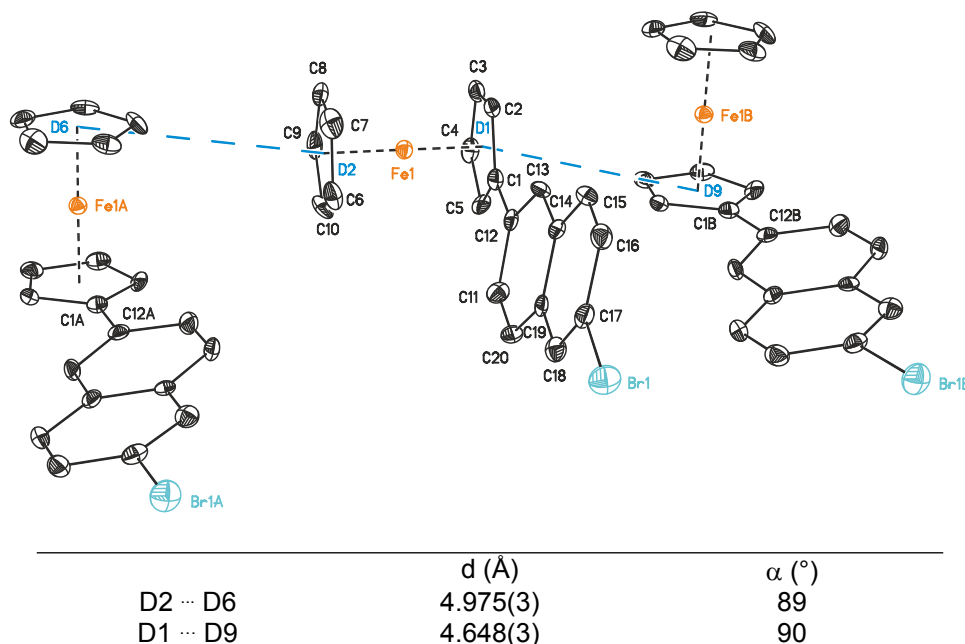

**Figure S111.** ORTEP (50 % probability level) of the molecular structure of **6d** with selected atom-numbering scheme, showing the intermolecular *T*-shaped  $\pi$ -interaction (blue dashed lines) between the

C<sub>5</sub>H<sub>5</sub> units and C<sub>4</sub>H<sub>5</sub> units. All hydrogen atoms and further interactions have been omitted for clarity. (Symmetry code for generating-equivalent atoms; A: 5/2-x, -1/2+y, z; B: 5/2-x, 1/2+y, z).

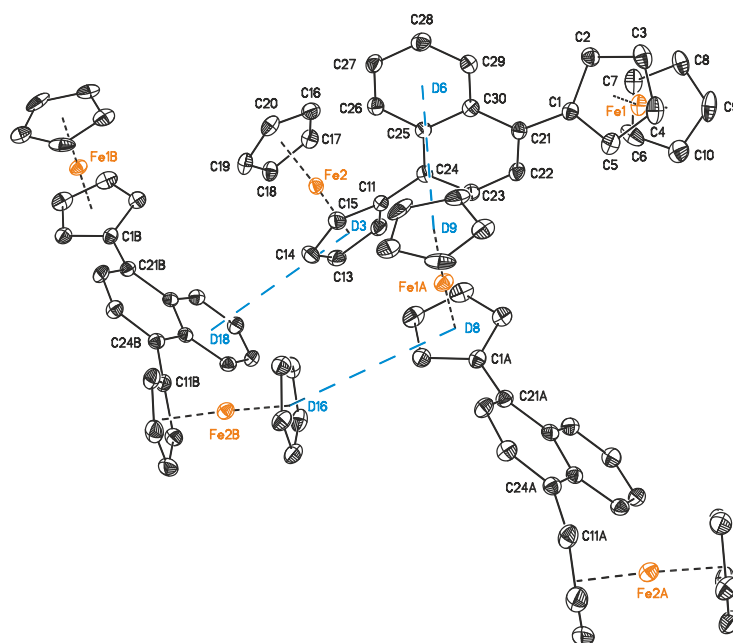

|            | d (Å)    | $\alpha$ (°) |
|------------|----------|--------------|
| D8 ... D16 | 4.606(3) | 88.7(3)      |
| D9 ... D6  | 4.758(7) | 87.5(6)      |
| D3 ... D18 | 4.820(3) | 83.7(2)      |

**Figure S112.** ORTEP (50 % probability level) of the molecular structure of **7a** with selected atom-numbering scheme, showing the intermolecular *T*-shaped  $\pi$ -interaction (blue dashed lines) between the C<sub>5</sub>H<sub>5</sub> unit and the C<sub>6</sub>H<sub>4</sub> moiety (including C25 to C30). All hydrogen atoms and further interactions have been omitted for clarity. (Symmetry code for generating-equivalent atoms; A: -x, -y, z-1/2; B: 1-x, -y, z-1/2).

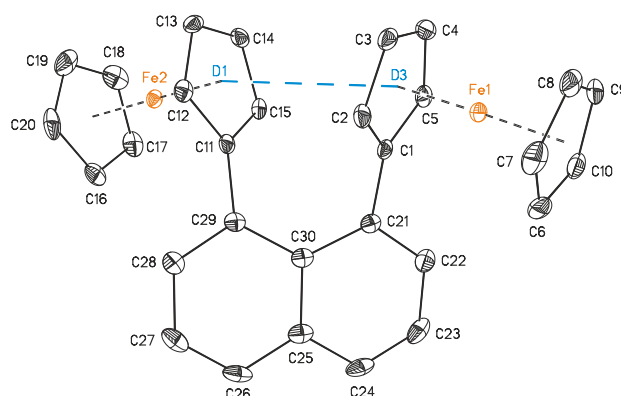

|         | d (Å)    | $\alpha$ (°) |
|---------|----------|--------------|
| D ... D | 3.860(2) | 28.62(11)    |

**Figure S113.** ORTEP (50 % probability level) of the molecular structure of **7c** with selected atom-numbering scheme, showing the intramolecular  $\pi$ - $\pi$  interaction between the C<sub>5</sub>H<sub>5</sub> unit of the ferrocene moiety. All hydrogen atoms have been omitted for clarity.

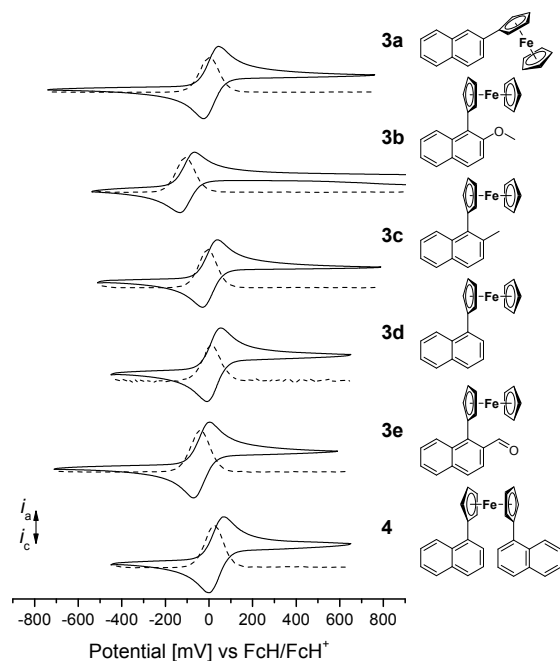

**Figure S114.** Cyclic and square wave voltammograms (CV: potential area -1000 to 1000 mV; SW: potential area -1000 to 750 mV) of **3a–3e** and **4**. Conditions: scan rate  $100 \text{ mV s}^{-1}$  (CV),  $2.5 \text{ mV s}^{-1}$  (SW) in dichloromethane solutions ( $1.0 \text{ mmol L}^{-1}$ ), supporting electrolyte  $0.1 \text{ mol L}^{-1} [\text{N}^{\text{t}}\text{Bu}_4][\text{B}(\text{C}_6\text{F}_5)_4]$ , working electrode glassy carbon.

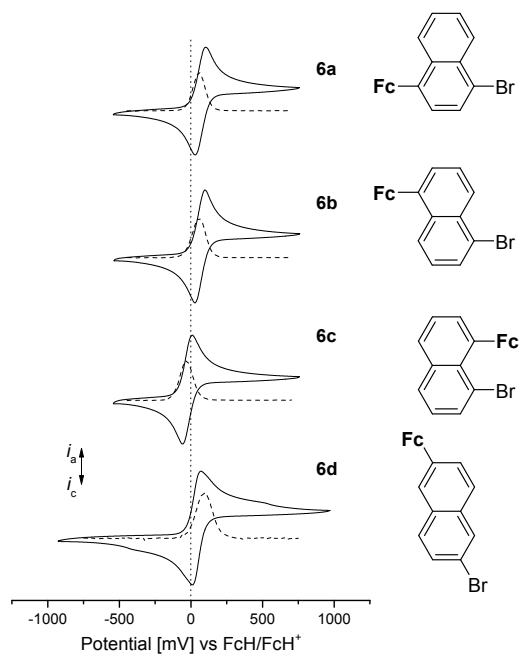

**Figure S115.** Cyclic and square wave voltammograms (CV: potential area -1000 to 1000 mV; SW: potential area -1000 to 750 mV) of **6a–d**. Conditions: scan rate  $100 \text{ mV s}^{-1}$  (CV),  $2.5 \text{ mV s}^{-1}$  (SW) in dichloromethane solutions ( $1.0 \text{ mmol L}^{-1}$ ), supporting electrolyte  $0.1 \text{ mol L}^{-1} [\text{N}^{\text{t}}\text{Bu}_4][\text{B}(\text{C}_6\text{F}_5)_4]$ , working electrode glassy carbon.

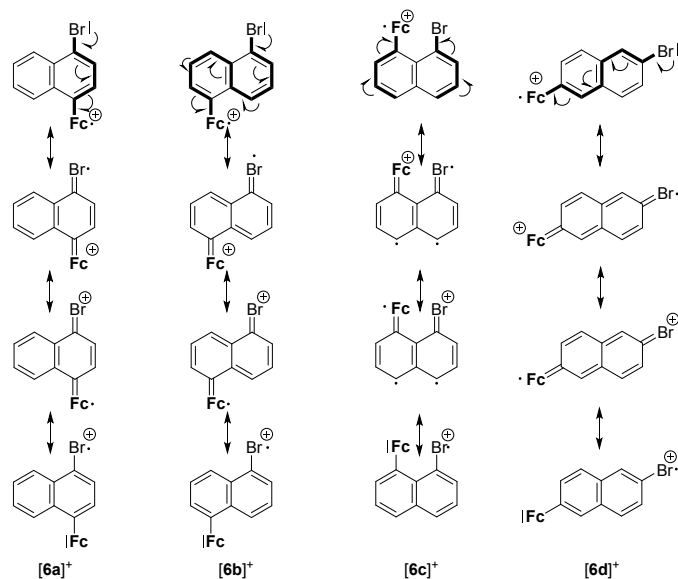

**Scheme S12.** Resonance structures illustrating the through-bond charge transfer pathways in  $[6a]^+$ ,  $[6b]^+$ ,  $[6c]^+$  and  $[6d]^+$ .

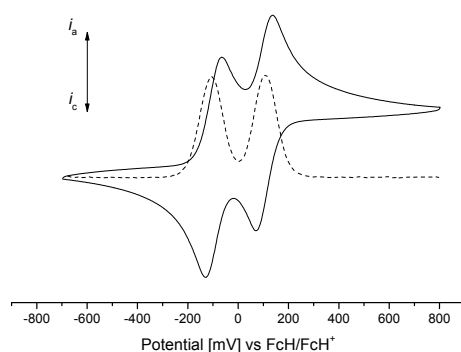

**Figure S16.** Cyclic and square wave voltammograms (CV: potential area -500 to 1000 mV; SW: potential area -500 to 750 mV) of **7c**. Conditions: scan rate  $100 \text{ mV s}^{-1}$  (CV),  $2.5 \text{ mV s}^{-1}$  (SW) in dichloromethane solutions ( $1.0 \text{ mmol L}^{-1}$ ), supporting electrolyte  $0.1 \text{ mol L}^{-1} [N^+Bu_4][PF_6]$ , working electrode glassy carbon.

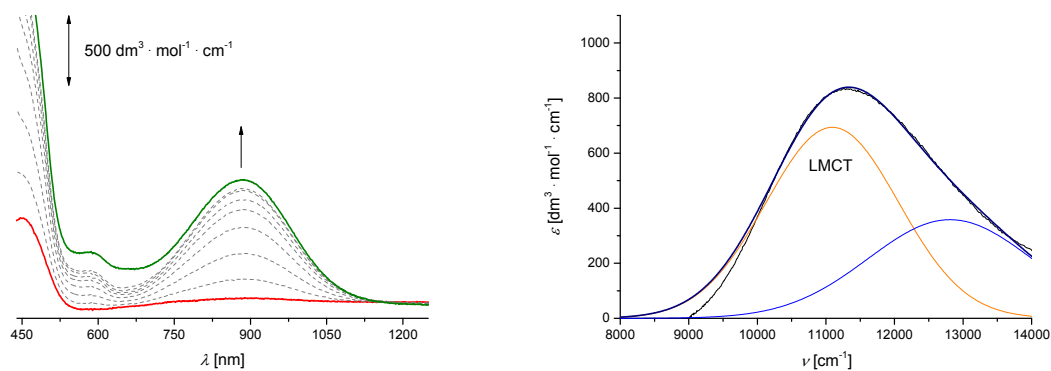

**Figure S17.** Left: vis/NIR spectra of **3a** at  $25 \text{ }^\circ\text{C}$  in dichloromethane ( $2.00 \text{ mmol} \cdot \text{L}^{-1}$ ) at rising potentials ( $-200$  to  $1100 \text{ mV vs Ag/Ag}^+$ ); supporting electrolyte  $[N^+Bu_4][B(C_6F_5)_4]$ ; arrows indicate the increasing absorptions. Right: Deconvolution of the NIR absorption of  $[3a]^+$  using two Gaussian shaped bands.



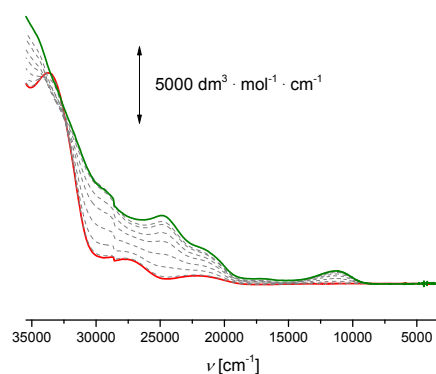

**Figure S118.** UV/vis/NIR spectra of **3a** at 25 °C in dichloromethane ( $2.00 \text{ mmol} \cdot \text{L}^{-1}$ ) at rising potentials (-200 to 1100 mV vs Ag/Ag<sup>+</sup>); supporting electrolyte  $[\text{N}^n\text{Bu}_4][\text{B}(\text{C}_6\text{F}_5)_4]$ .

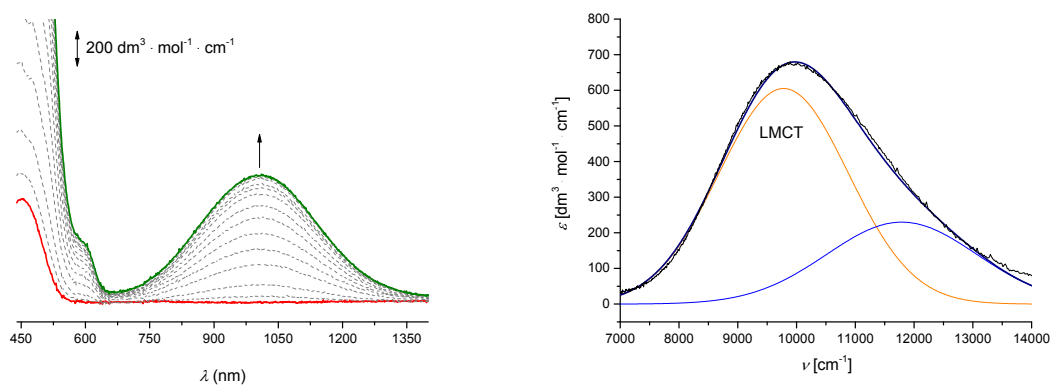

**Figure S119.** Left: vis/NIR spectra of **3b** at 25 °C in dichloromethane ( $2.00 \text{ mmol} \cdot \text{L}^{-1}$ ) at rising potentials (-200 to 1000 mV vs Ag/Ag<sup>+</sup>); supporting electrolyte  $[\text{N}^n\text{Bu}_4][\text{B}(\text{C}_6\text{F}_5)_4]$ ; arrows indicate the increasing absorptions. Right: Deconvolution of the NIR absorption of  $[\mathbf{3b}]^+$  using two Gaussian shaped bands.

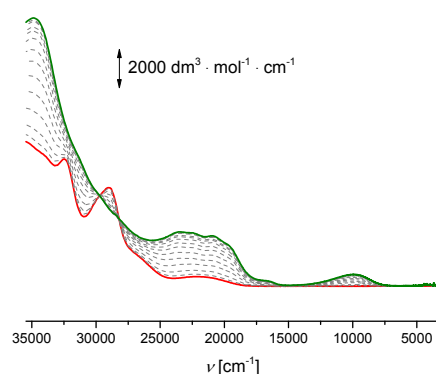

**Figure S120.** UV/vis/NIR spectra of **3b** at 25 °C in dichloromethane ( $2.00 \text{ mmol} \cdot \text{L}^{-1}$ ) at rising potentials (-200 to 1000 mV vs Ag/Ag<sup>+</sup>); supporting electrolyte  $[\text{N}^n\text{Bu}_4][\text{B}(\text{C}_6\text{F}_5)_4]$ .

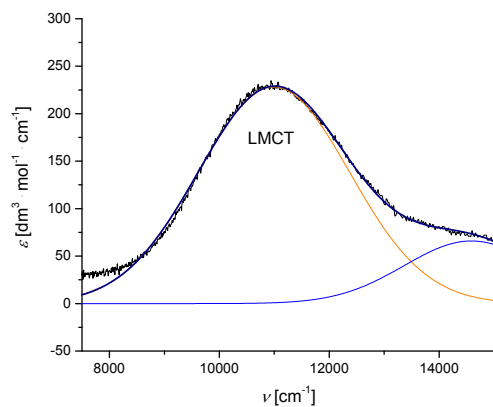

**Figure S121.** Deconvolution of the NIR absorption of  $[3c]^+$  using two Gaussian shaped bands.

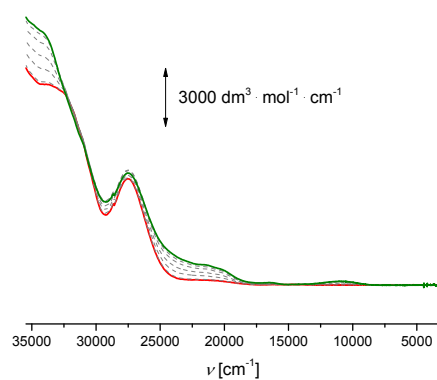

**Figure S122.** UV/vis/NIR spectra of  $3c$  at  $25\text{ }^\circ\text{C}$  in dichloromethane ( $2.00\text{ mmol} \cdot \text{L}^{-1}$ ) at rising potentials ( $-200$  to  $250\text{ mV vs Ag/Ag}^+$ ); supporting electrolyte  $[\text{N}^n\text{Bu}_4][\text{B}(\text{C}_6\text{F}_5)_4]$ .

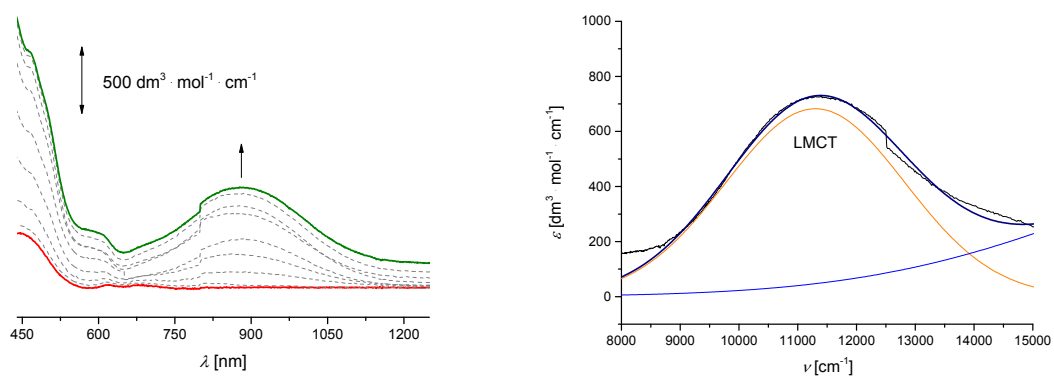

**Figure S123.** Left: vis/NIR spectra of  $3d$  at  $25\text{ }^\circ\text{C}$  in dichloromethane ( $2.00\text{ mmol} \cdot \text{L}^{-1}$ ) at rising potentials ( $-200$  to  $400\text{ mV vs Ag/Ag}^+$ ); supporting electrolyte  $[\text{N}^n\text{Bu}_4][\text{B}(\text{C}_6\text{F}_5)_4]$ ; arrows indicate the increasing absorptions. Right: Deconvolution of the NIR absorption of  $[3d]^+$  using two Gaussian shaped bands.

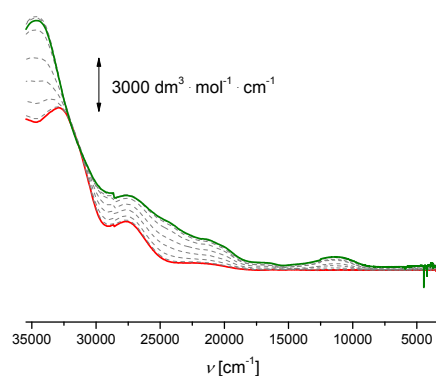

**Figure S124.** UV/vis/NIR spectra of **3d** at 25 °C in dichloromethane ( $2.00 \text{ mmol} \cdot \text{L}^{-1}$ ) at rising potentials (-200 to 400 mV vs Ag/Ag<sup>+</sup>); supporting electrolyte [N<sup>n</sup>Bu<sub>4</sub>][B(C<sub>6</sub>F<sub>5</sub>)<sub>4</sub>].

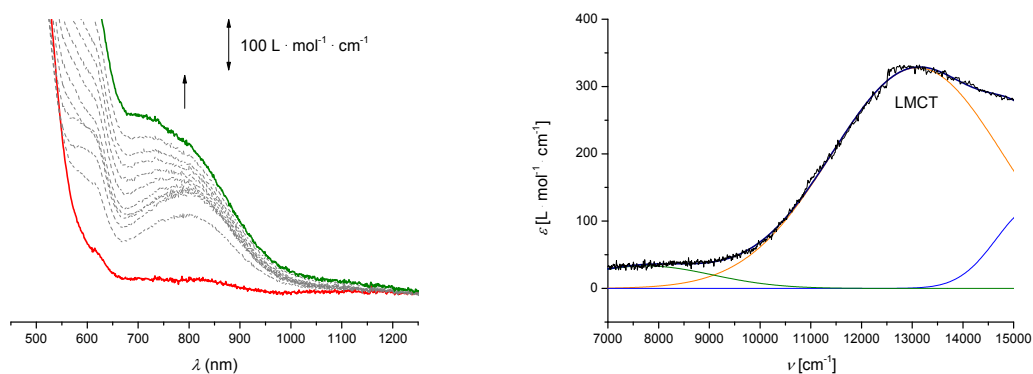

**Figure S125.** Left: vis/NIR spectra of **3e** at 25 °C in dichloromethane ( $2.00 \text{ mmol} \cdot \text{L}^{-1}$ ) at rising potentials (-200 to 950 mV vs Ag/Ag<sup>+</sup>); supporting electrolyte [N<sup>n</sup>Bu<sub>4</sub>][B(C<sub>6</sub>F<sub>5</sub>)<sub>4</sub>]; arrows indicate the increasing absorptions. Right: Deconvolution of the NIR absorption of [**3e**]<sup>+</sup> using three Gaussian shaped bands.

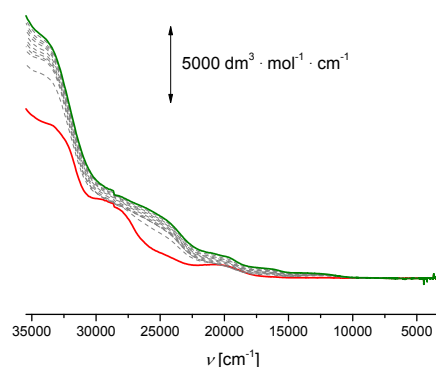

**Figure S126.** UV/vis/NIR spectra of **3e** at 25 °C in dichloromethane ( $2.00 \text{ mmol} \cdot \text{L}^{-1}$ ) at rising potentials (-200 to 950 mV vs Ag/Ag<sup>+</sup>); supporting electrolyte [N<sup>n</sup>Bu<sub>4</sub>][B(C<sub>6</sub>F<sub>5</sub>)<sub>4</sub>].

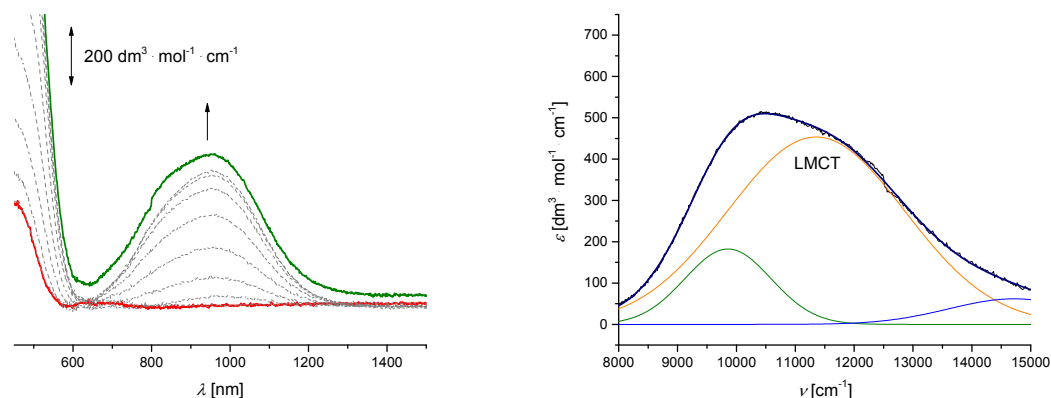

**Figure S127.** Left: vis/NIR spectra of **4** at 25 °C in dichloromethane (2.00 mmol · L<sup>-1</sup>) at rising potentials (-200 to 400 mV vs Ag/Ag<sup>+</sup>); supporting electrolyte [N<sup>n</sup>Bu<sub>4</sub>][B(C<sub>6</sub>F<sub>5</sub>)<sub>4</sub>]; arrows indicate the increasing absorptions. Right: Deconvolution of the NIR absorption of [4]<sup>+</sup> using three Gaussian shaped bands.

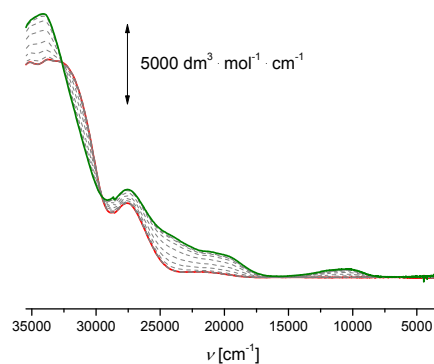

**Figure S128.** UV/vis/NIR spectra of **4** at 25 °C in dichloromethane (2.00 mmol · L<sup>-1</sup>) at rising potentials (-200 to 400 mV vs Ag/Ag<sup>+</sup>); supporting electrolyte [N<sup>n</sup>Bu<sub>4</sub>][B(C<sub>6</sub>F<sub>5</sub>)<sub>4</sub>].

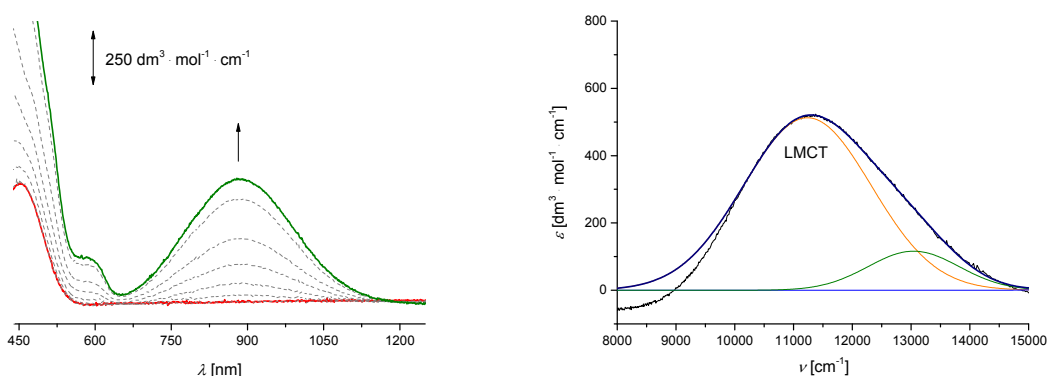

**Figure S29.** Left: vis/NIR spectra of **6a** at 25 °C in dichloromethane (2.00 mmol · L<sup>-1</sup>) at rising potentials (-200 to 950 mV vs Ag/Ag<sup>+</sup>); supporting electrolyte [N<sup>n</sup>Bu<sub>4</sub>][B(C<sub>6</sub>F<sub>5</sub>)<sub>4</sub>]; arrows indicate the increasing absorptions. Right: Deconvolution of the NIR absorption of [6a]<sup>+</sup> using three Gaussian shaped bands.

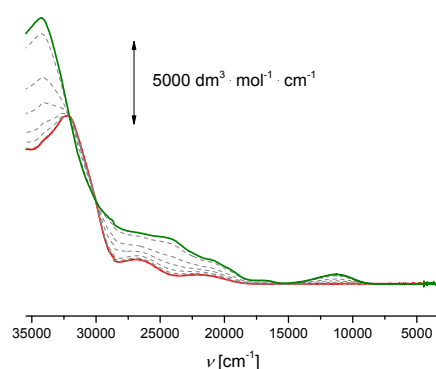

**Figure S30.** UV/vis/NIR spectra of **6a** at 25 °C in dichloromethane (2.00 mmol · L<sup>-1</sup>) at rising potentials (-200 to 950 mV vs Ag/Ag<sup>+</sup>); supporting electrolyte [N<sup>n</sup>Bu<sub>4</sub>][B(C<sub>6</sub>F<sub>5</sub>)<sub>4</sub>].

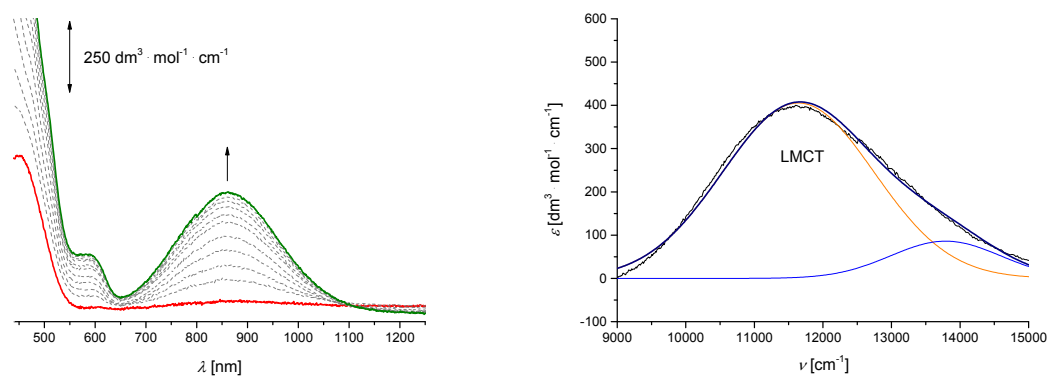

**Figure SI31.** Left: vis/NIR spectra of **6b** at 25 °C in dichloromethane (2.00 mmol · L<sup>-1</sup>) at rising potentials (-200 to 1100 mV vs Ag/Ag<sup>+</sup>); supporting electrolyte [N<sup>n</sup>Bu<sub>4</sub>][B(C<sub>6</sub>F<sub>5</sub>)<sub>4</sub>]; arrows indicate the increasing absorptions. Right: Deconvolution of the NIR absorption of [**6b**]<sup>+</sup> using two Gaussian shaped bands.

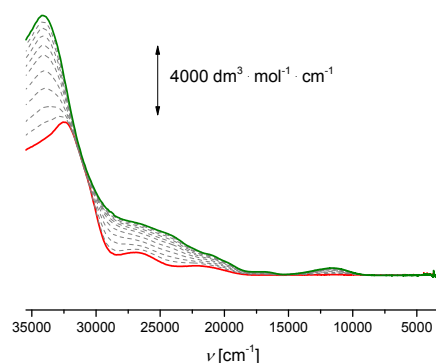

**Figure SI32.** Left: UV/vis/NIR spectra of **6b** at 25 °C in dichloromethane (2.00 mmol · L<sup>-1</sup>) at rising potentials (-200 to 1100 mV vs Ag/Ag<sup>+</sup>); supporting electrolyte [N<sup>n</sup>Bu<sub>4</sub>][B(C<sub>6</sub>F<sub>5</sub>)<sub>4</sub>].

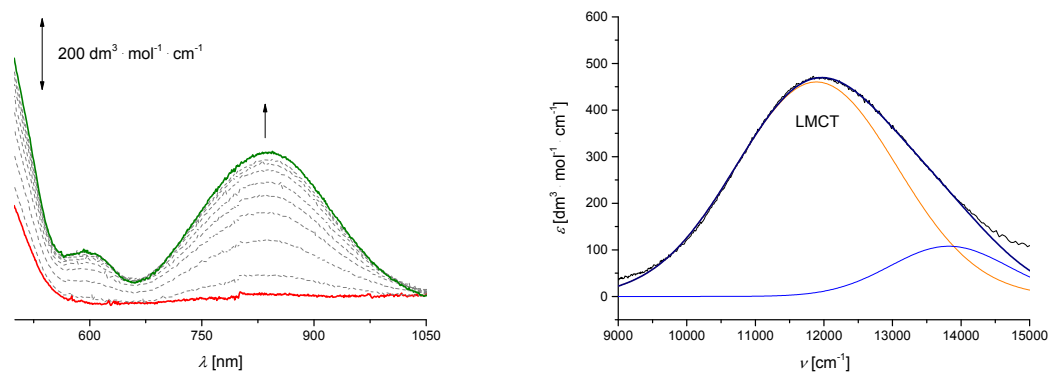

**Figure S133.** Left: vis/NIR spectra of **6c** at 25 °C in dichloromethane ( $2.00 \text{ mmol} \cdot \text{L}^{-1}$ ) at rising potentials (-200 to 800 mV vs Ag/Ag<sup>+</sup>); supporting electrolyte  $[\text{N}^{\text{b}}\text{Bu}_4][\text{B}(\text{C}_6\text{F}_5)_4]$ ; arrows indicate the increasing absorptions. Right: Deconvolution of the NIR absorption of  $[\mathbf{6c}]^+$  using two Gaussian shaped bands.

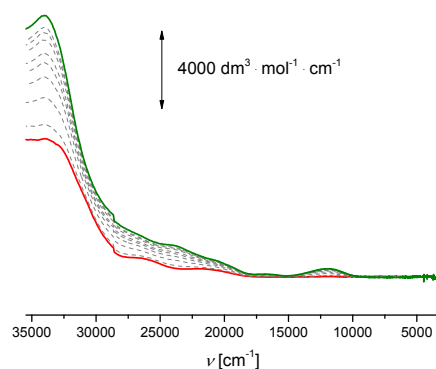

**Figure S134.** UV/vis/NIR spectra of **6c** at 25 °C in dichloromethane ( $2.00 \text{ mmol} \cdot \text{L}^{-1}$ ) at rising potentials (-200 to 800 mV vs Ag/Ag<sup>+</sup>); supporting electrolyte  $[\text{N}^{\text{b}}\text{Bu}_4][\text{B}(\text{C}_6\text{F}_5)_4]$ .

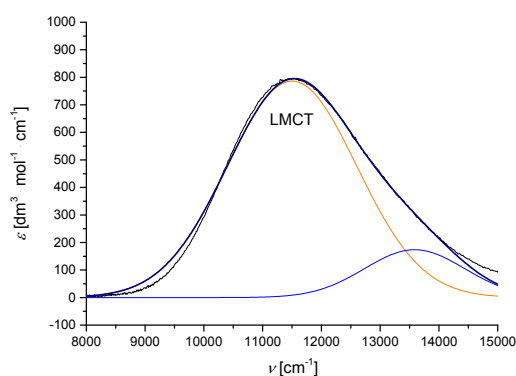

**Figure S135.** Deconvolution of the NIR absorption of  $[\mathbf{6d}]^+$  using two Gaussian shaped bands.

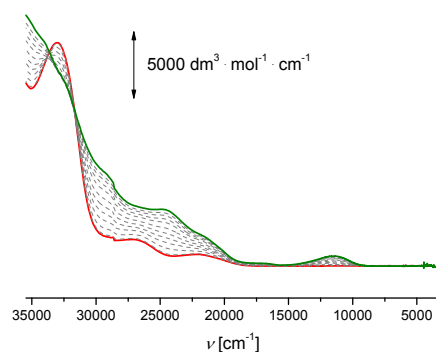

**Figure S136.** UV/vis/NIR spectra of **6d** at 25 °C in dichloromethane ( $2.00 \text{ mmol} \cdot \text{L}^{-1}$ ) at rising potentials (-200 to 900 mV vs Ag/Ag<sup>+</sup>); supporting electrolyte [N<sup>n</sup>Bu<sub>4</sub>][B(C<sub>6</sub>F<sub>5</sub>)<sub>4</sub>].

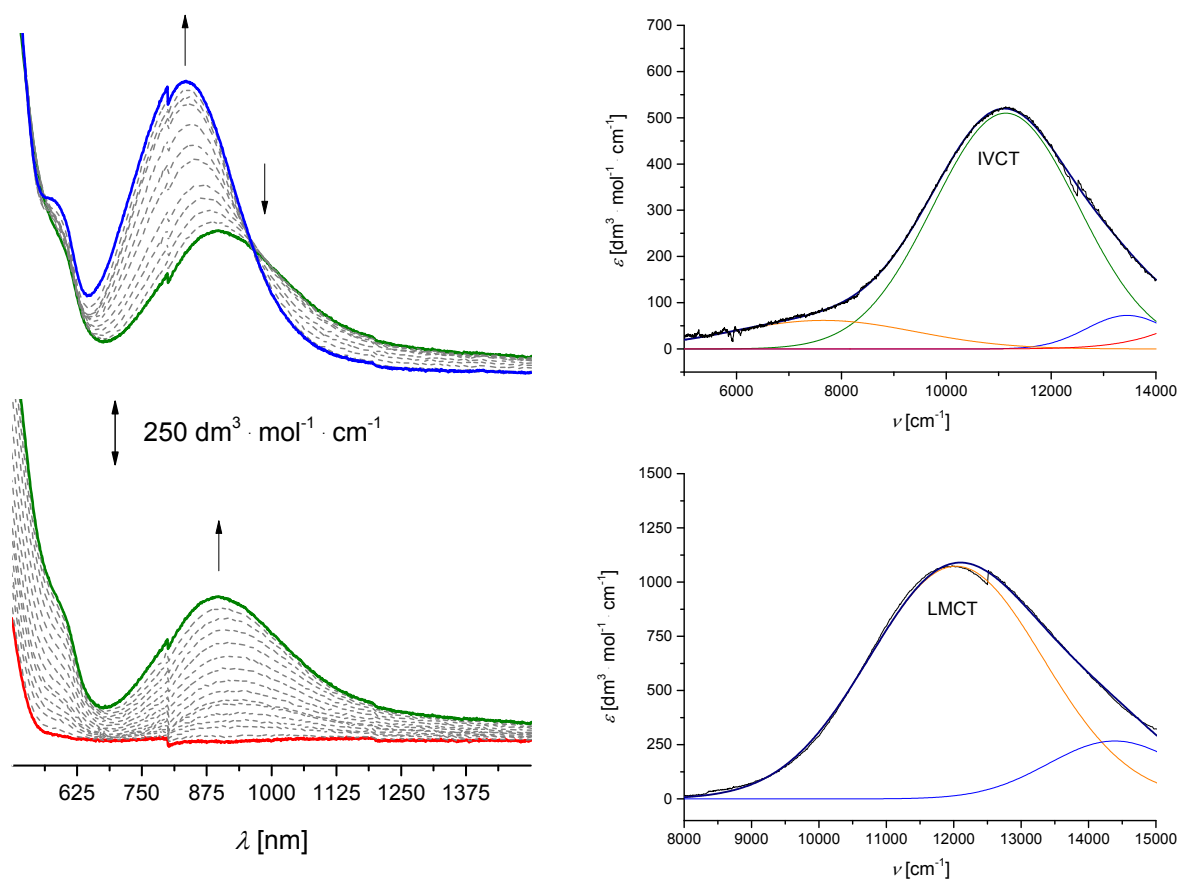

**Figure S137.** Left: vis/NIR spectra of 1,5-diferrocenylnaphthalene (**7b**) at 25 °C in dichloromethane ( $2.00 \text{ mmol} \cdot \text{L}^{-1}$ ) at rising potentials (-200 to 555 mV; top: 555 to 1100 mV vs Ag/Ag<sup>+</sup>); supporting electrolyte [N<sup>n</sup>Bu<sub>4</sub>][B(C<sub>6</sub>F<sub>5</sub>)<sub>4</sub>]; arrows indicate the increasing and decreasing absorptions. Right, top: Deconvolution of the NIR absorption of [**7b**]<sup>+</sup> using three Gaussian shaped bands. Right, bottom: Deconvolution of NIR absorption of [**7b**]<sup>2+</sup> using two Gaussian shaped bands.

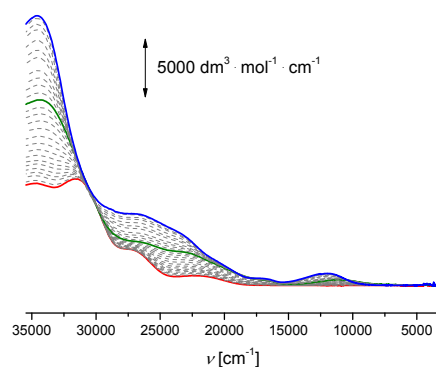

**Figure S138.** UV/vis/NIR spectra of 1,5-diferrocenylnaphthalene (**7b**) at 25 °C in dichloromethane (2.00 mmol · L<sup>-1</sup>) at rising potentials (-200 to 1100 mV vs Ag/Ag<sup>+</sup>); supporting electrolyte [N<sup>n</sup>Bu<sub>4</sub>][B(C<sub>6</sub>F<sub>5</sub>)<sub>4</sub>].

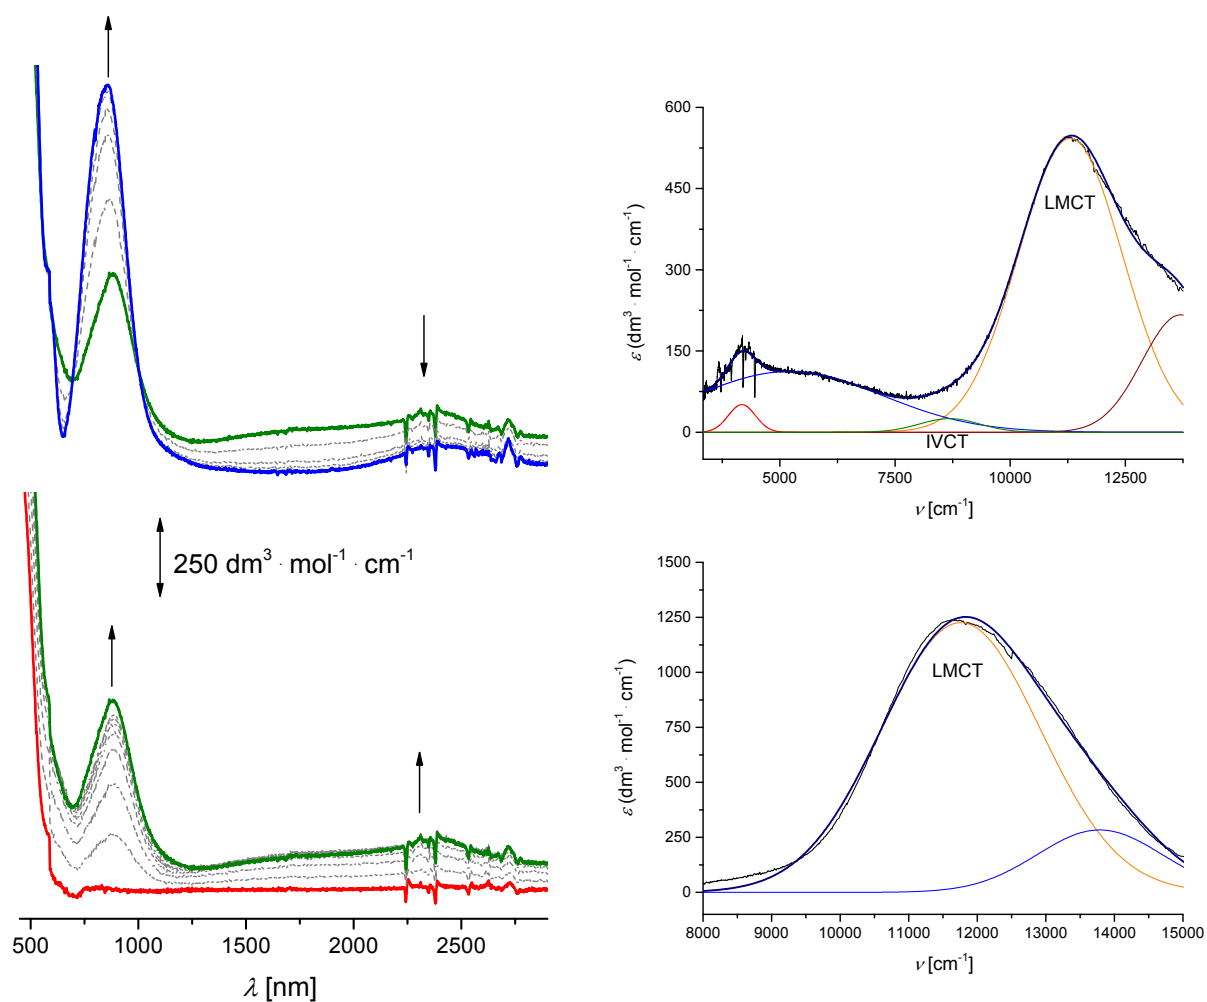

**Figure S139.** Left: vis/NIR spectra of 1,8-diferrocenylnaphthalene (**7c**) at 25 °C in dichloromethane (2.00 mmol · L<sup>-1</sup>) at rising potentials (bottom: -200 to 525 mV; top: 525 to 700 mV vs Ag/Ag<sup>+</sup>); supporting electrolyte [N<sup>n</sup>Bu<sub>4</sub>][B(C<sub>6</sub>F<sub>5</sub>)<sub>4</sub>]; arrows indicate the increasing and decreasing absorptions. Right, top: Deconvolution of the NIR absorption of [7c]<sup>+</sup> using three Gaussian shaped bands. Right, bottom: Deconvolution of NIR absorption of [7c]<sup>2+</sup> using two Gaussian shaped bands.



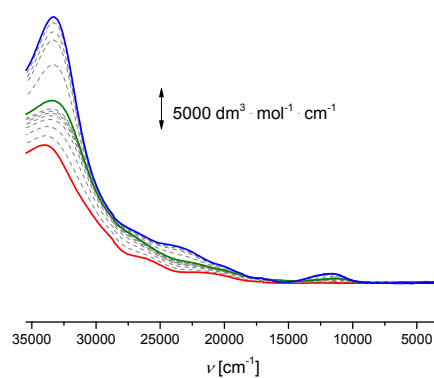

**Figure SI40.** UV/vis/NIR spectra of 1,8-diferrocenylnaphthalene (**7c**) at 25 °C in dichloromethane (2.00 mmol · L<sup>-1</sup>) at rising potentials (bottom: -200 to 700 mV vs Ag/Ag<sup>+</sup>); supporting electrolyte [N<sup>o</sup>Bu<sub>4</sub>][B(C<sub>6</sub>F<sub>5</sub>)<sub>4</sub>].

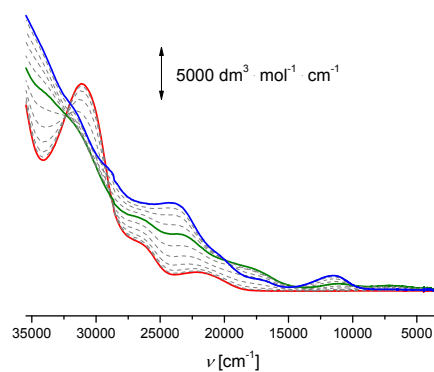

**Figure SI41.** UV/vis/NIR spectra of 2,6-diferrocenylnaphthalene (**7d**) at 25 °C in dichloromethane (2.00 mmol · L<sup>-1</sup>) at rising potentials (bottom: -200 to 700 mV vs Ag/Ag<sup>+</sup>); supporting electrolyte [N<sup>o</sup>Bu<sub>4</sub>][B(C<sub>6</sub>F<sub>5</sub>)<sub>4</sub>].

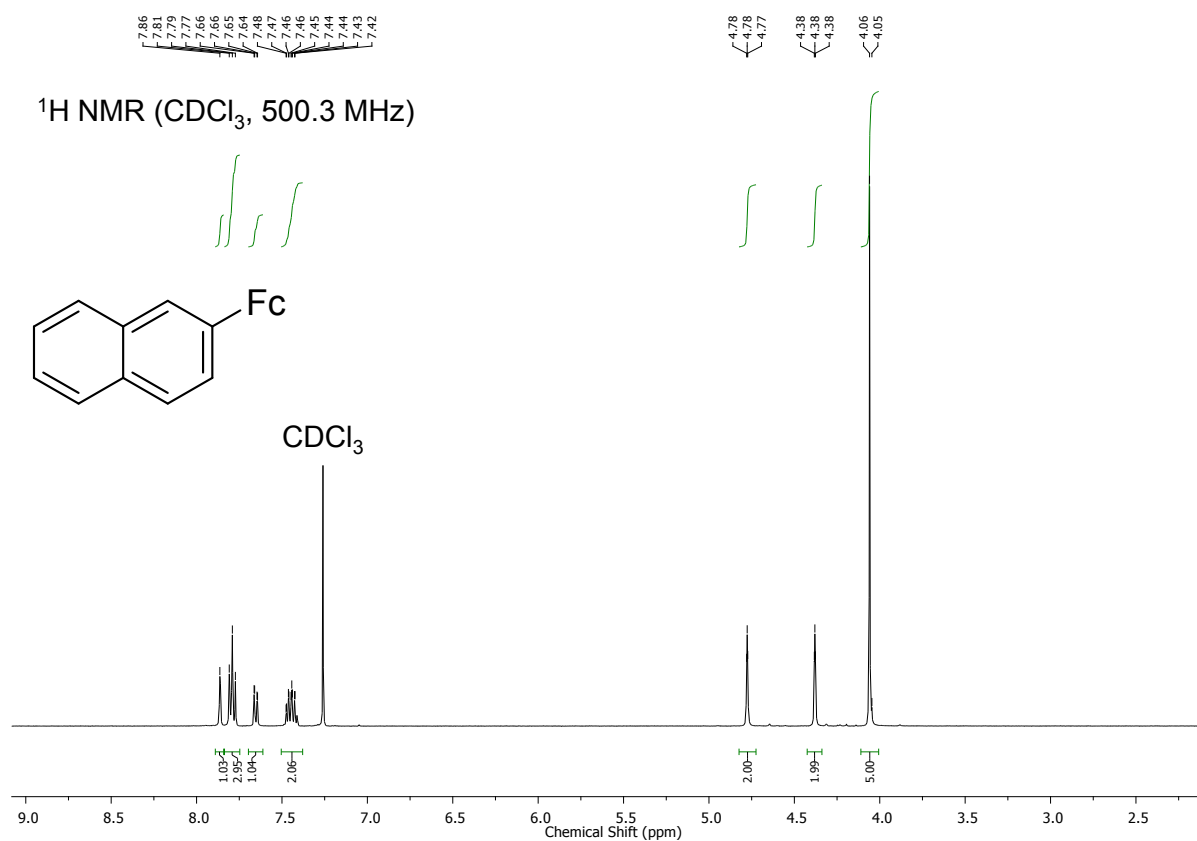

Figure S142. <sup>1</sup>H NMR spectrum of **3a** in CDCl<sub>3</sub>.

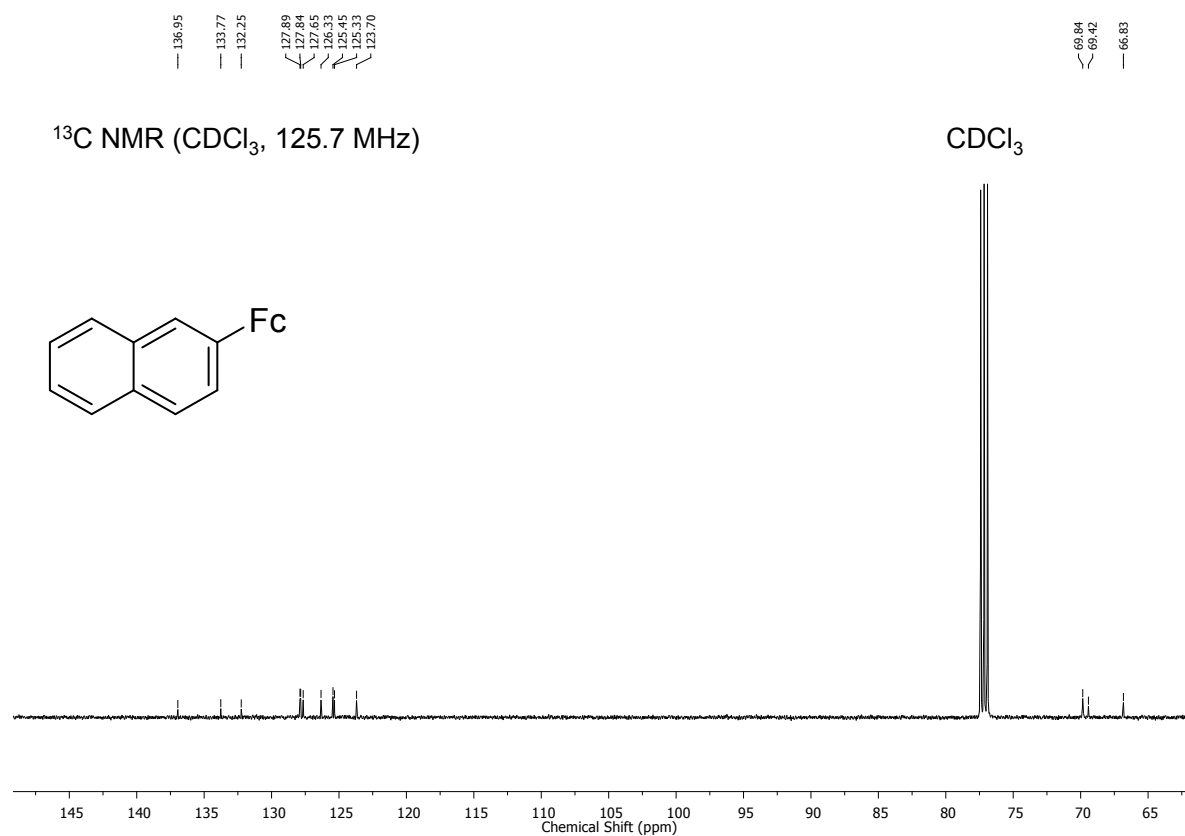

Figure S143. <sup>13</sup>C NMR spectrum of **3a** in CDCl<sub>3</sub>.

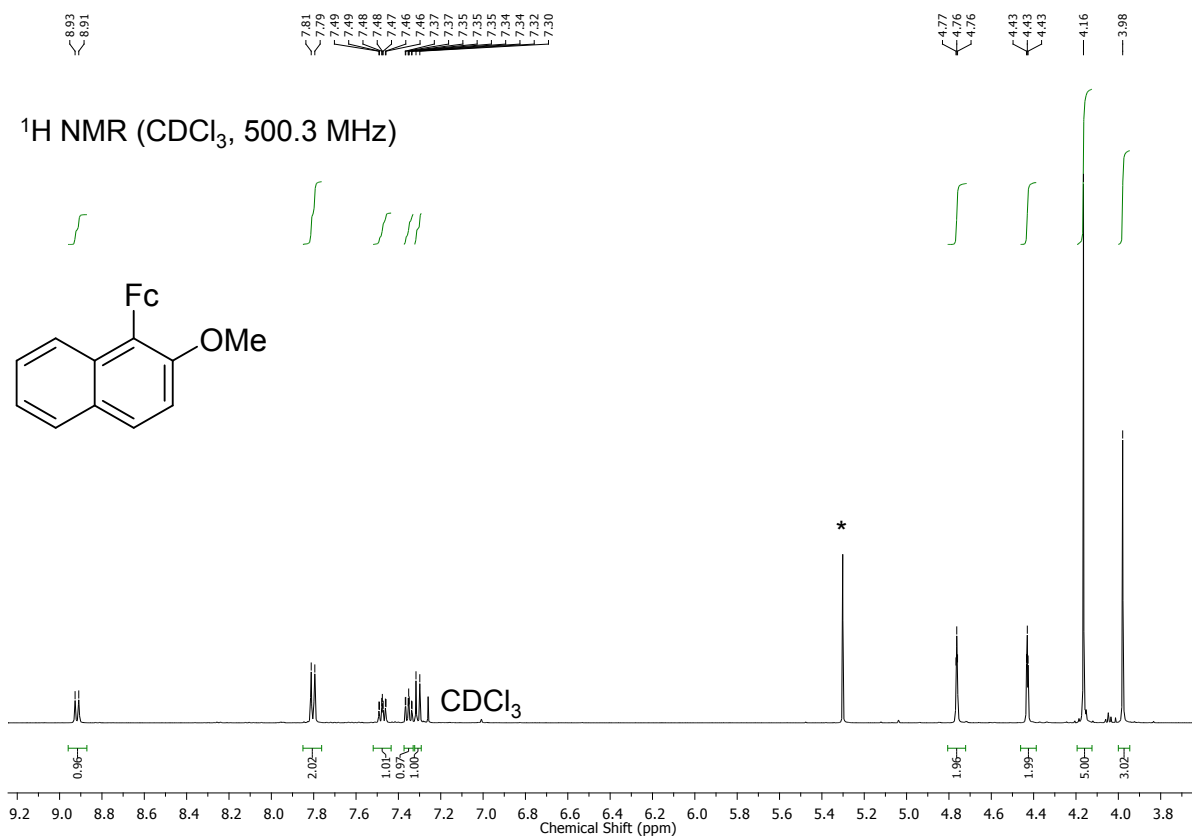

Figure S144. <sup>1</sup>H NMR spectrum of **3b** in CDCl<sub>3</sub>, \*CH<sub>2</sub>Cl<sub>2</sub>.

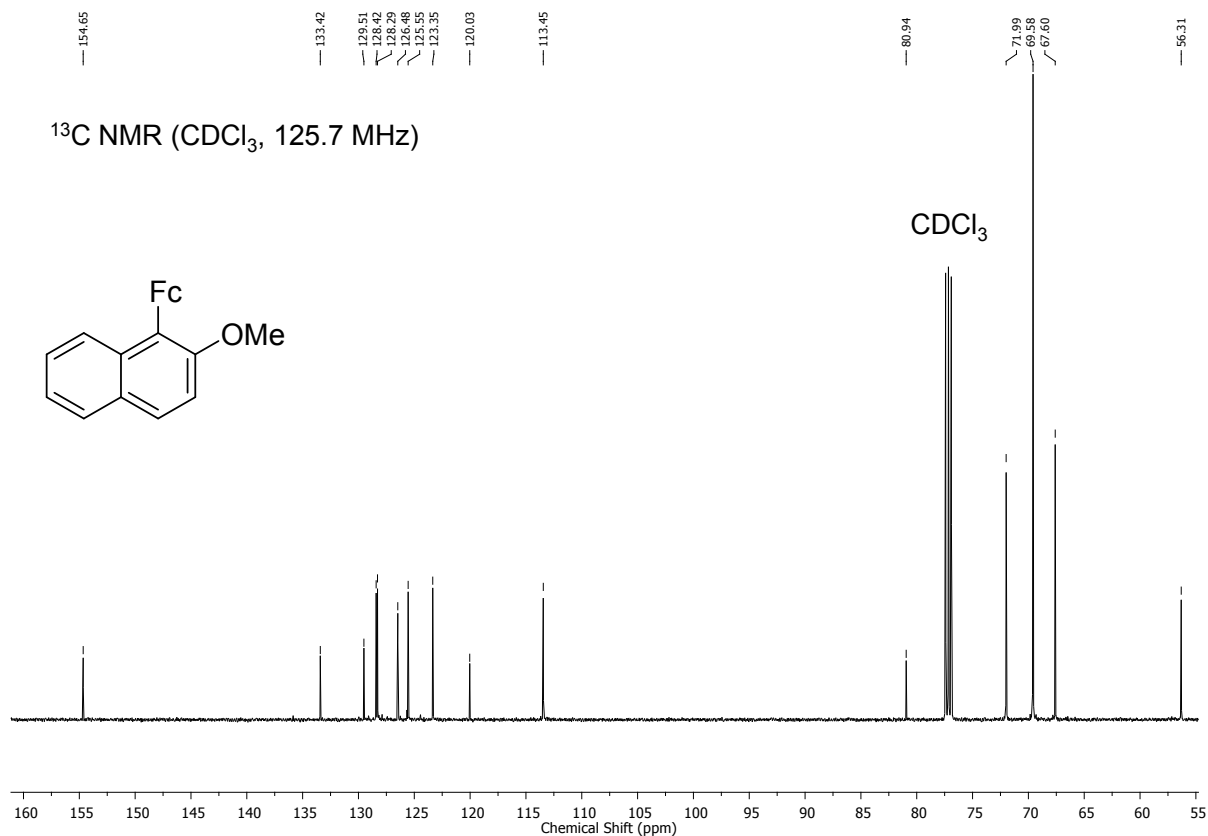

Figure S145. <sup>13</sup>C NMR spectrum of **3b** in CDCl<sub>3</sub>.

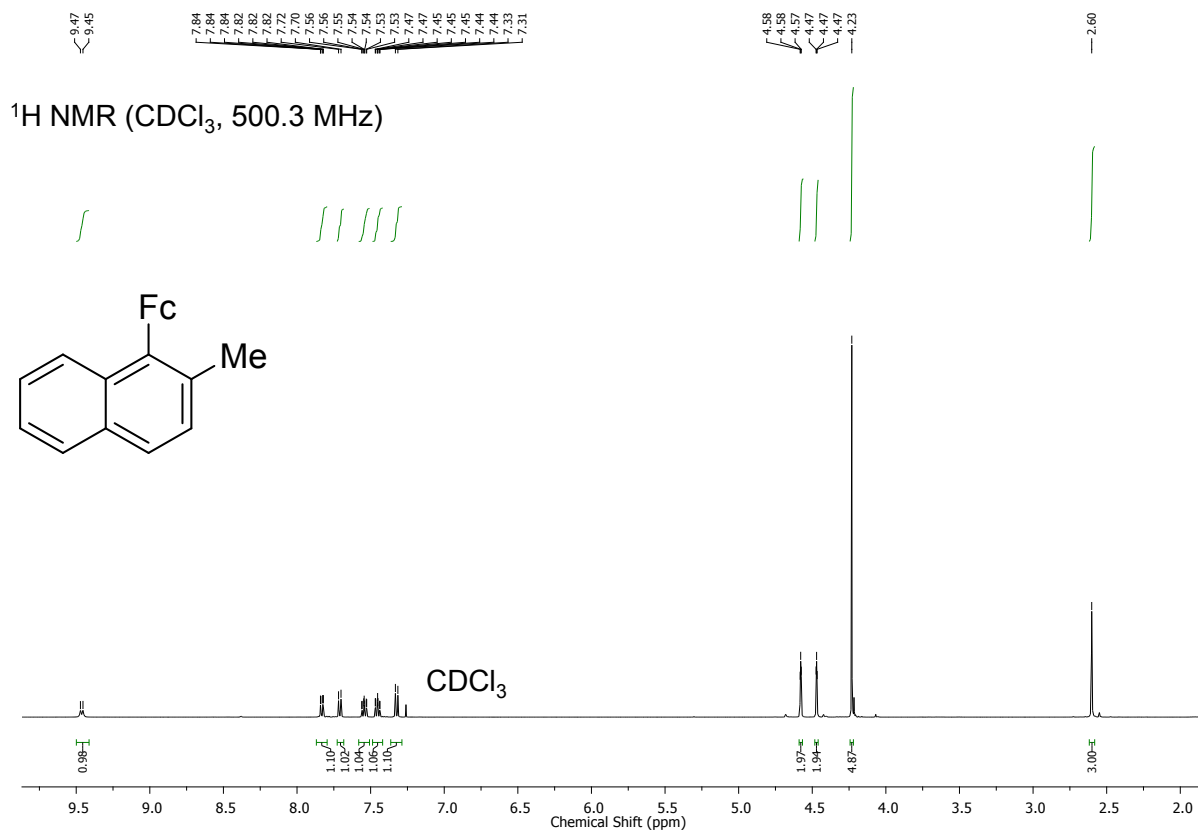

**Figure S146.** <sup>1</sup>H NMR spectrum of **3c** in CDCl<sub>3</sub>.

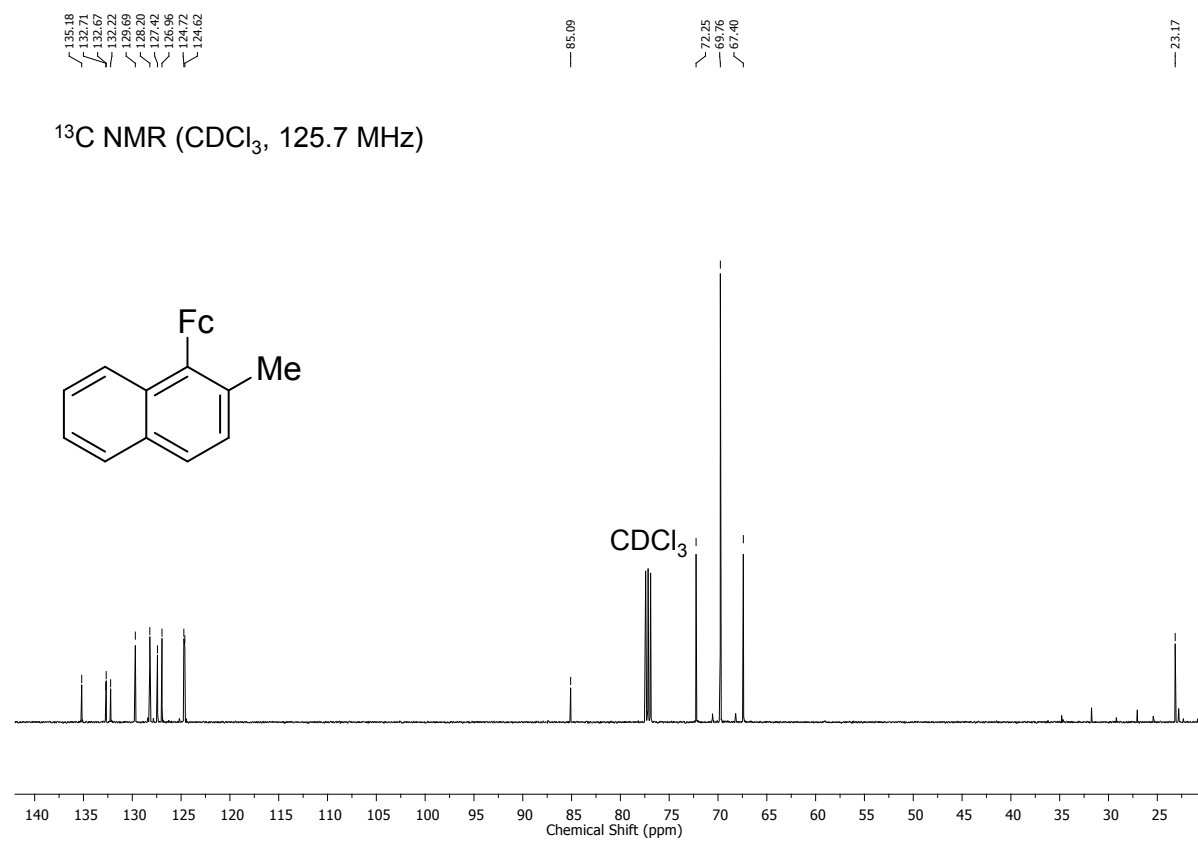

**Figure S147.** <sup>13</sup>C NMR spectrum of **3c** in CDCl<sub>3</sub>.

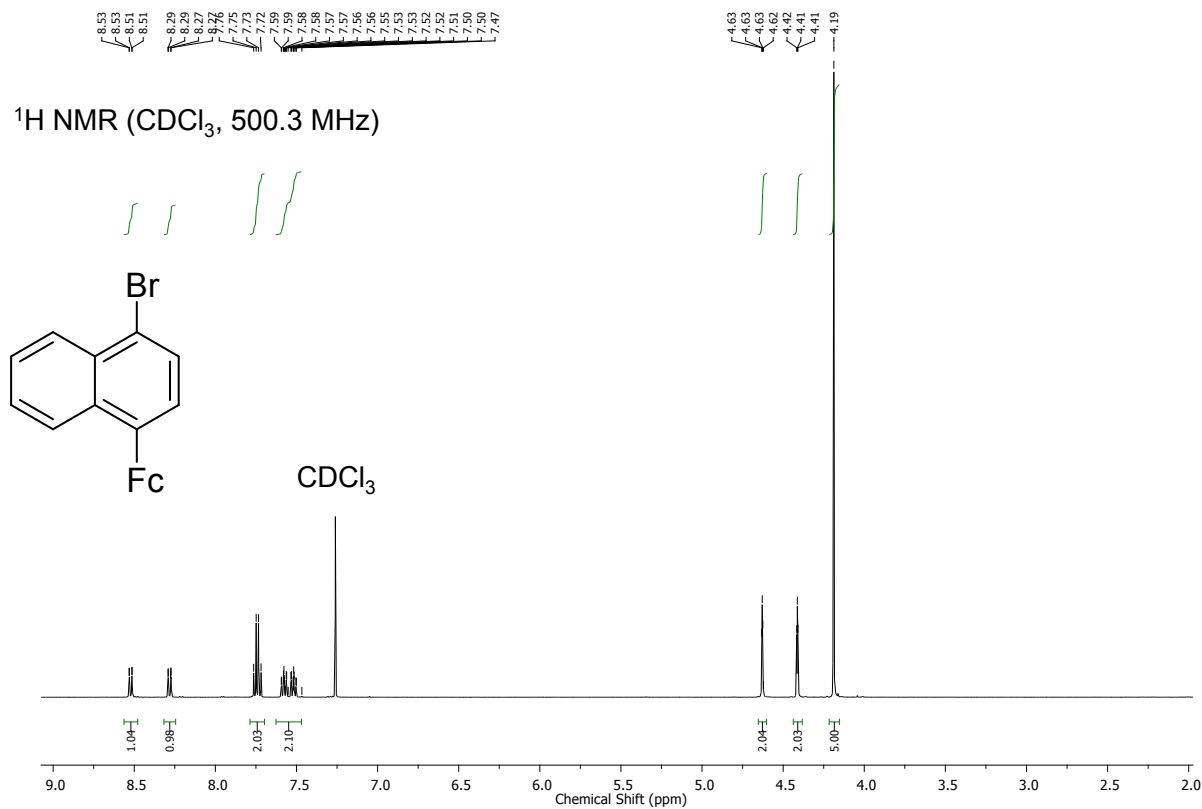

Figure S148. <sup>1</sup>H NMR spectrum of **6a** in CDCl<sub>3</sub>.

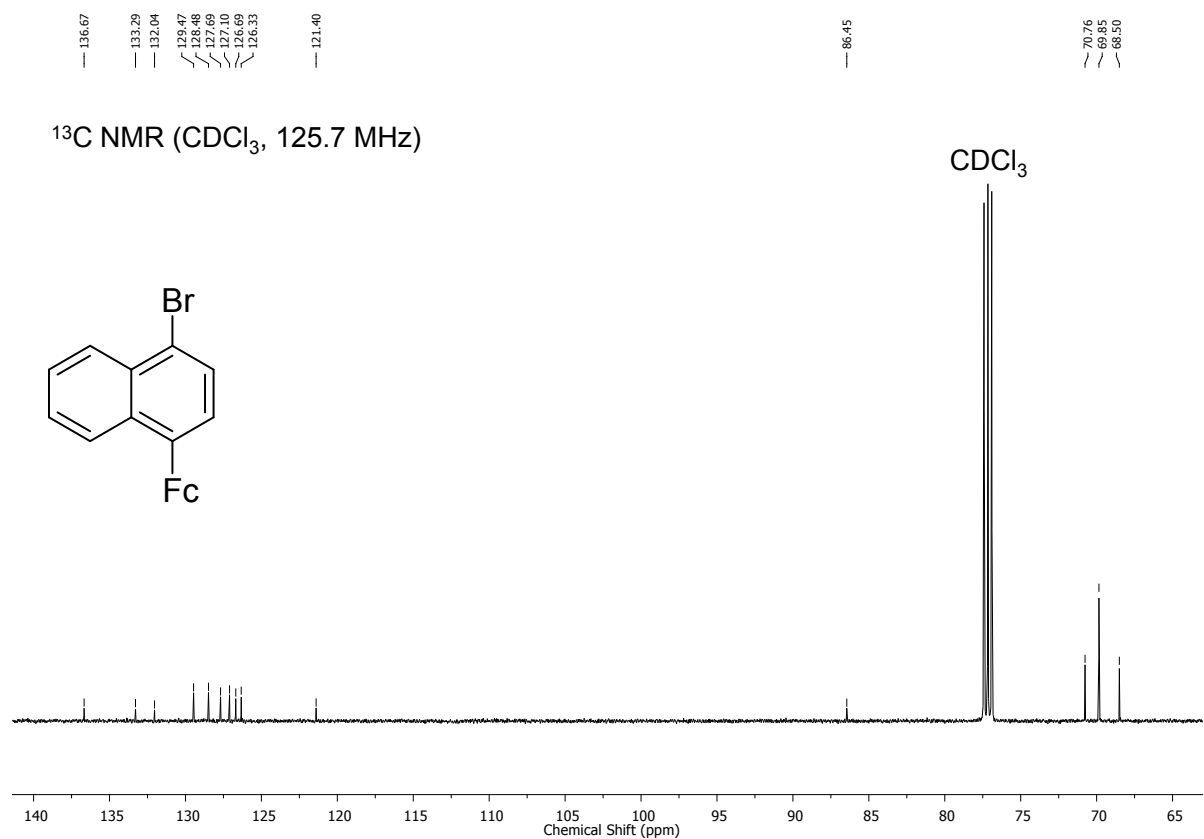

Figure S149. <sup>13</sup>C NMR spectrum of **6a** in CDCl<sub>3</sub>.

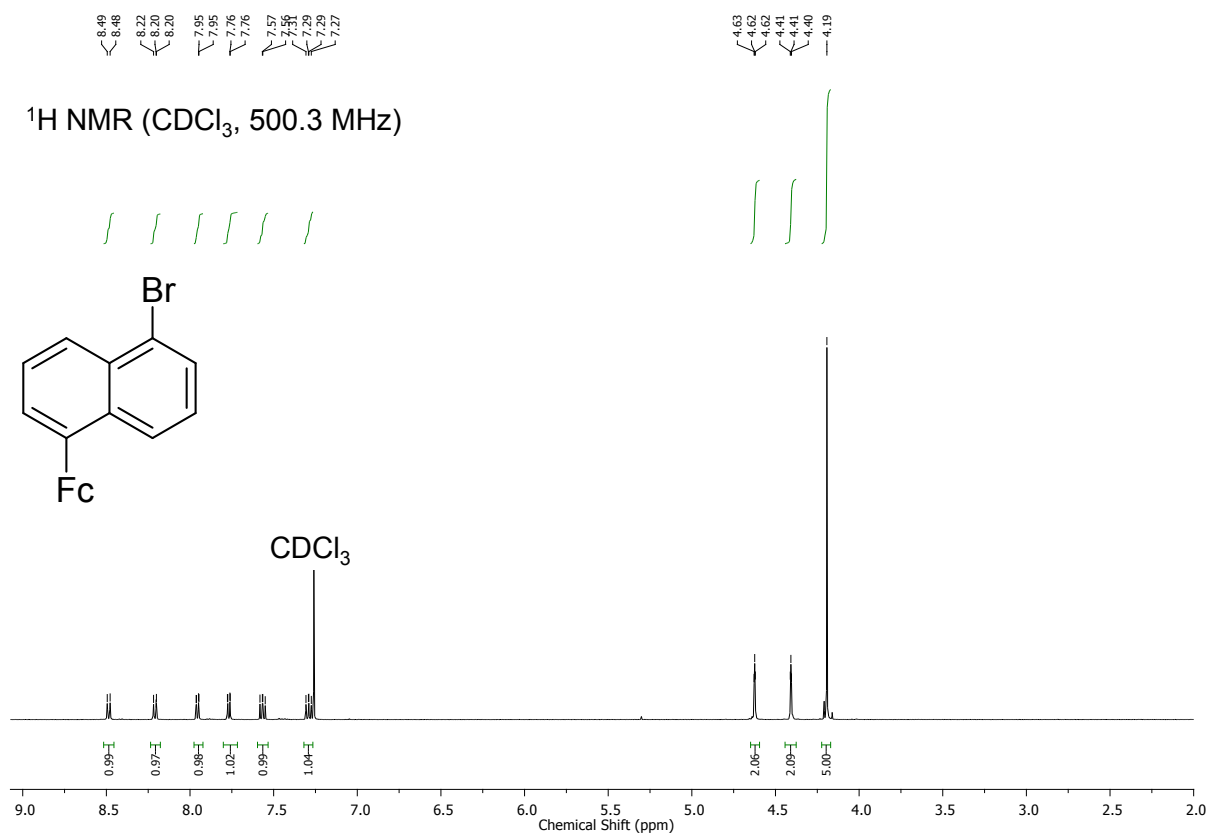

Figure S150. <sup>1</sup>H NMR spectrum of **6b** in CDCl<sub>3</sub>.

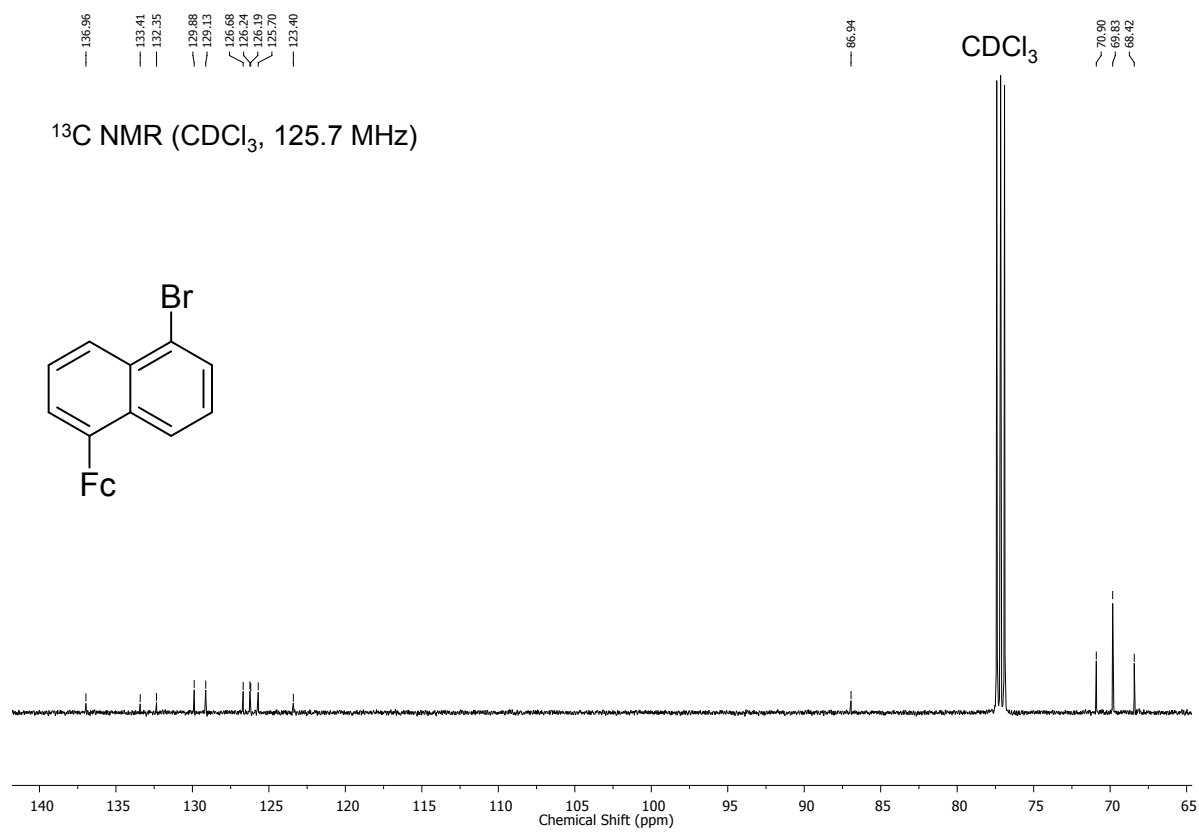

Figure S151. <sup>13</sup>C NMR spectrum of **6b** in CDCl<sub>3</sub>.

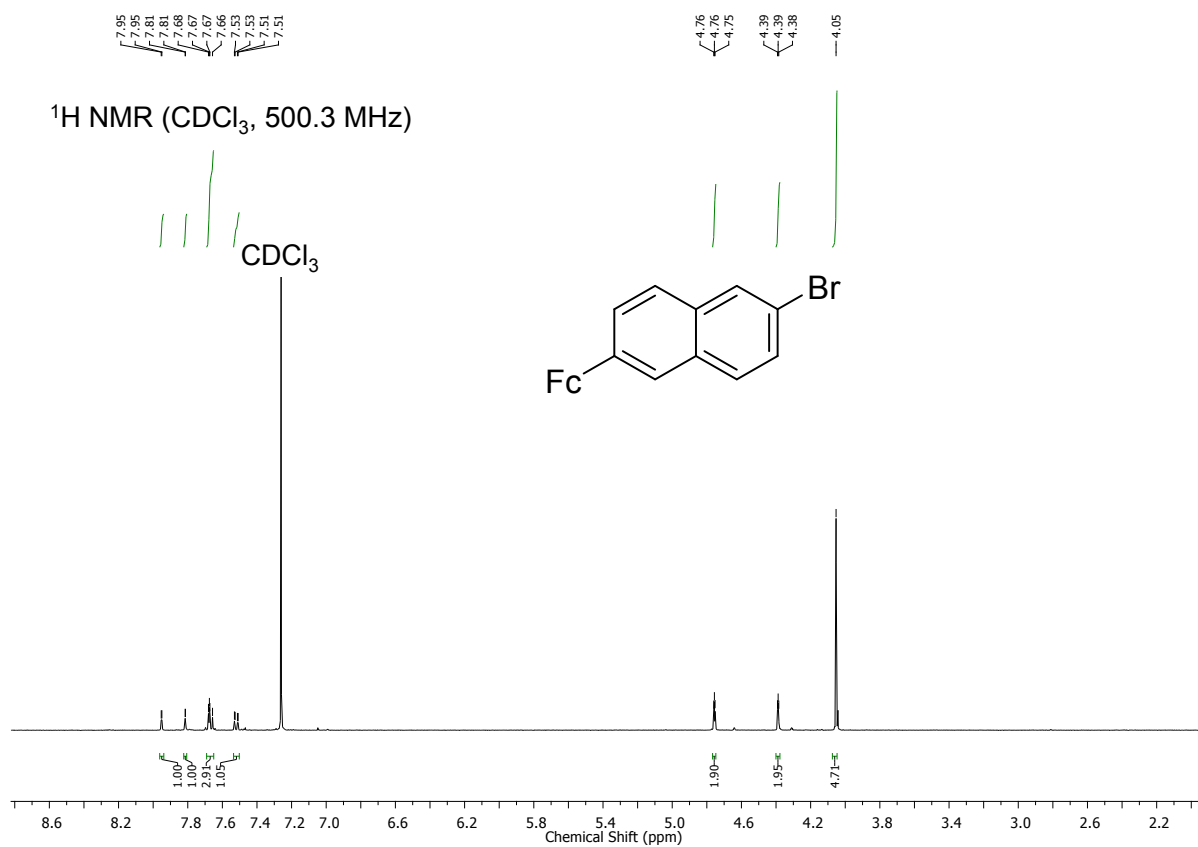

Figure S152. <sup>1</sup>H NMR spectrum of **6d** in CDCl<sub>3</sub>.

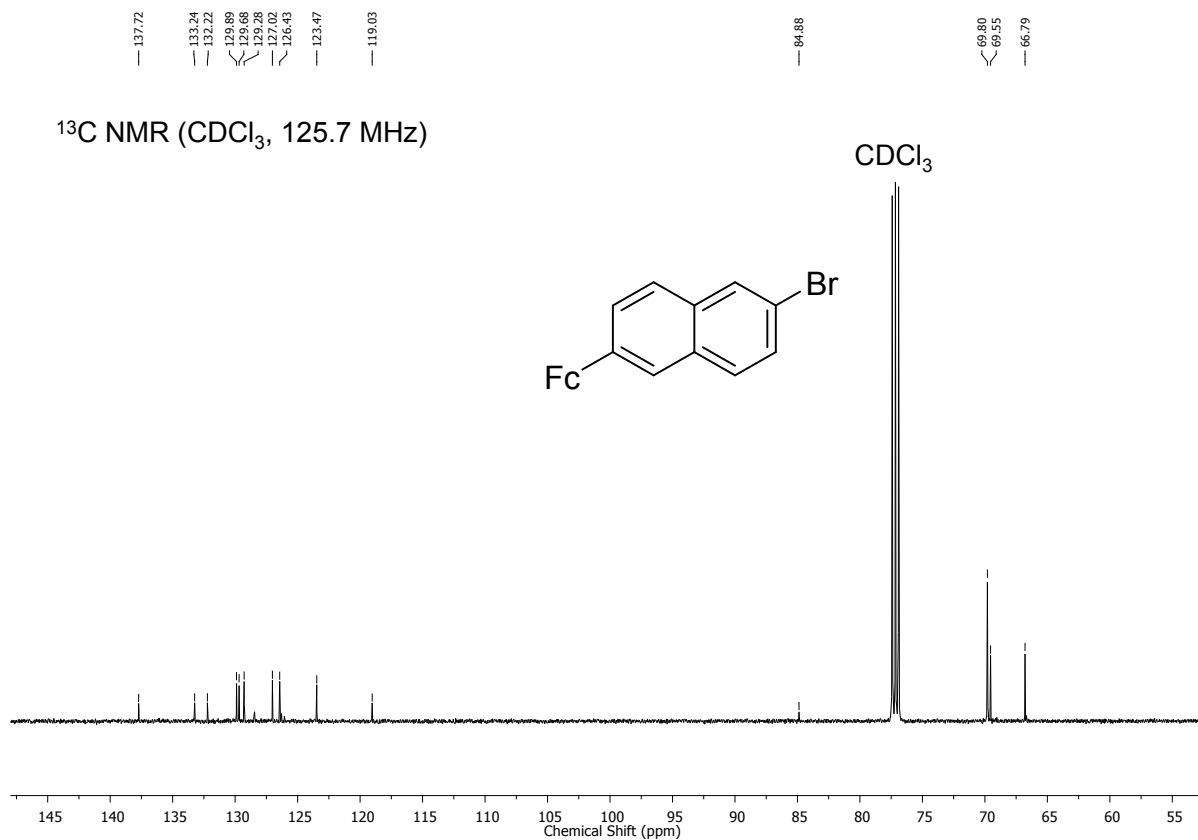

Figure S153. <sup>13</sup>C NMR spectrum of **6d** in CDCl<sub>3</sub>.

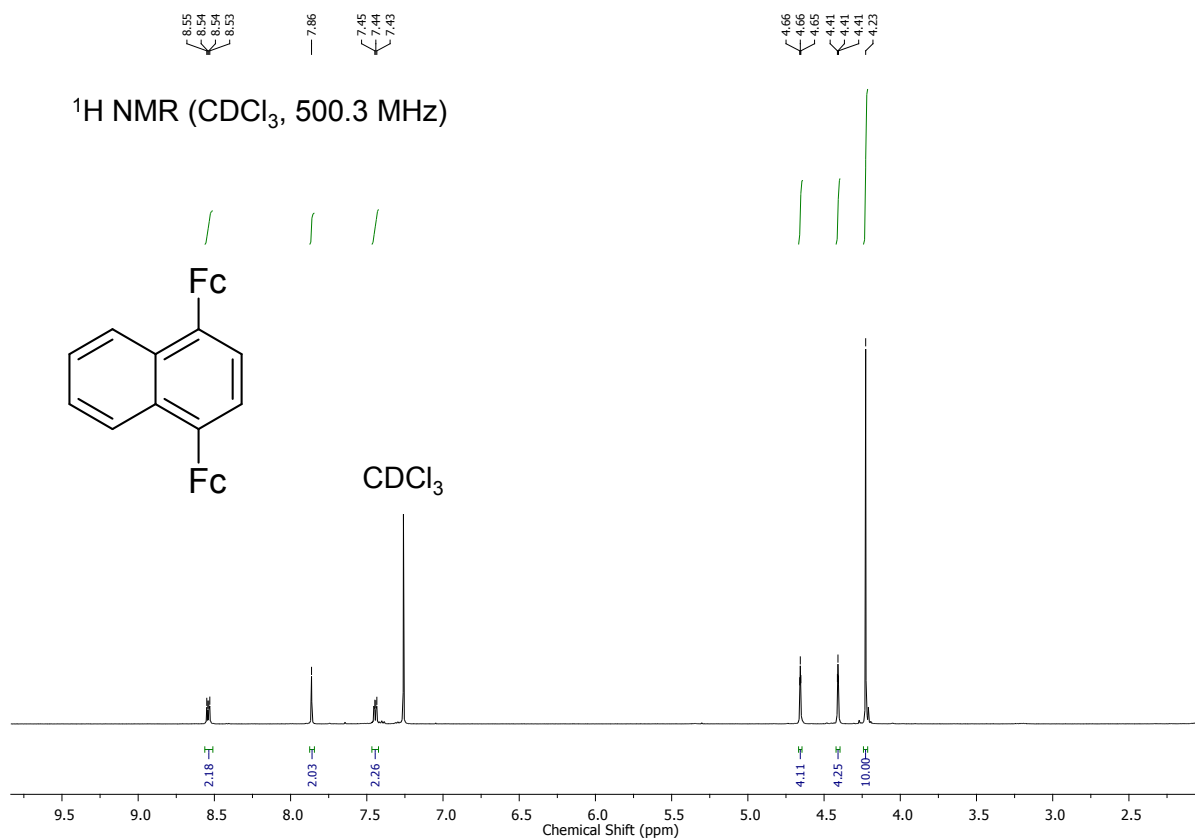

Figure S154. <sup>1</sup>H NMR spectrum of 7a in CDCl<sub>3</sub>.

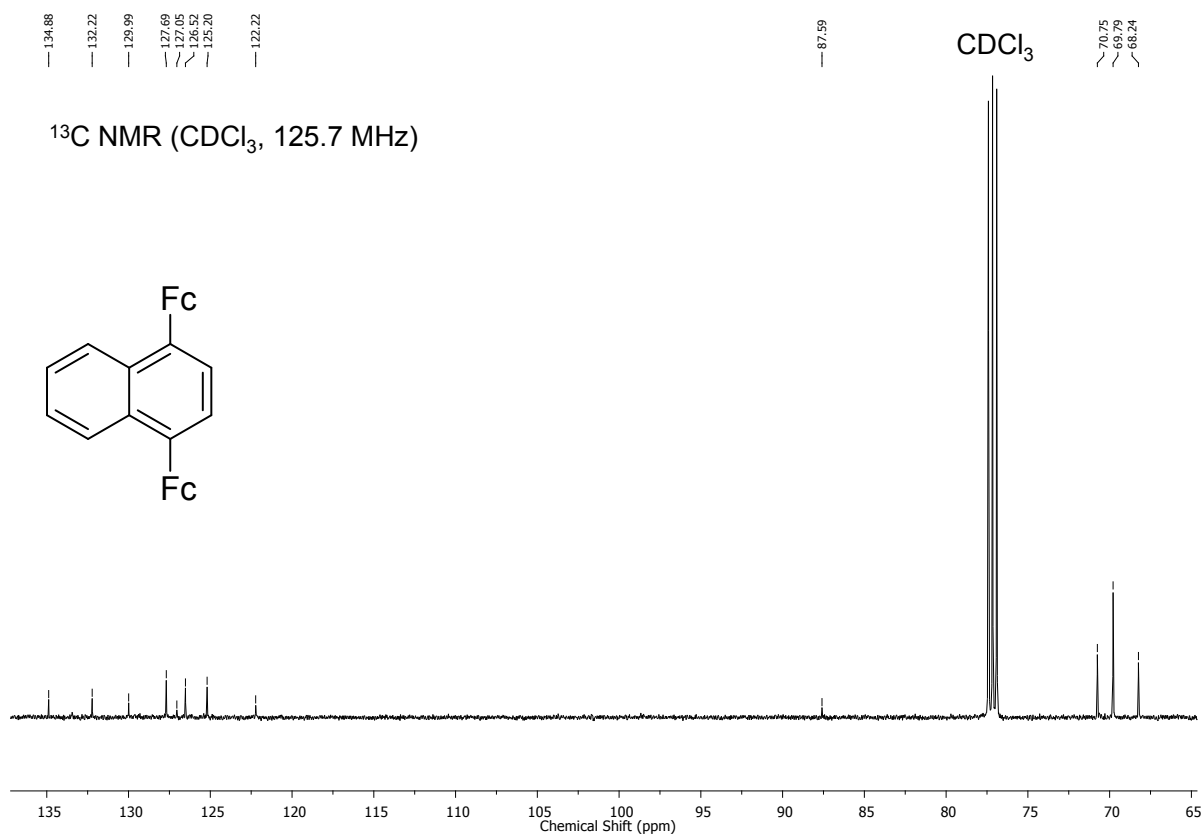

Figure S155. <sup>13</sup>C NMR spectrum of 7a in CDCl<sub>3</sub>.



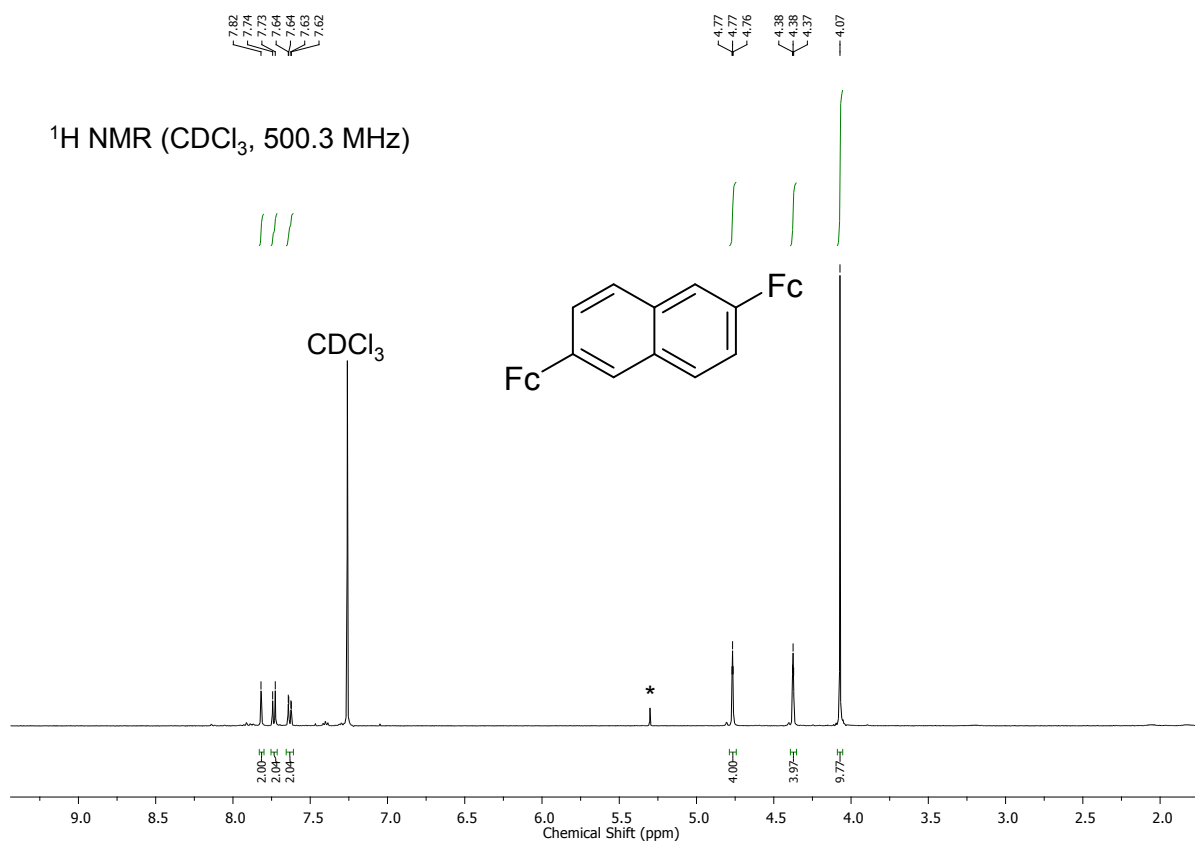

**Figure S156.** <sup>1</sup>H NMR spectrum of **7d** in CDCl<sub>3</sub>, \*CH<sub>2</sub>Cl<sub>2</sub>.

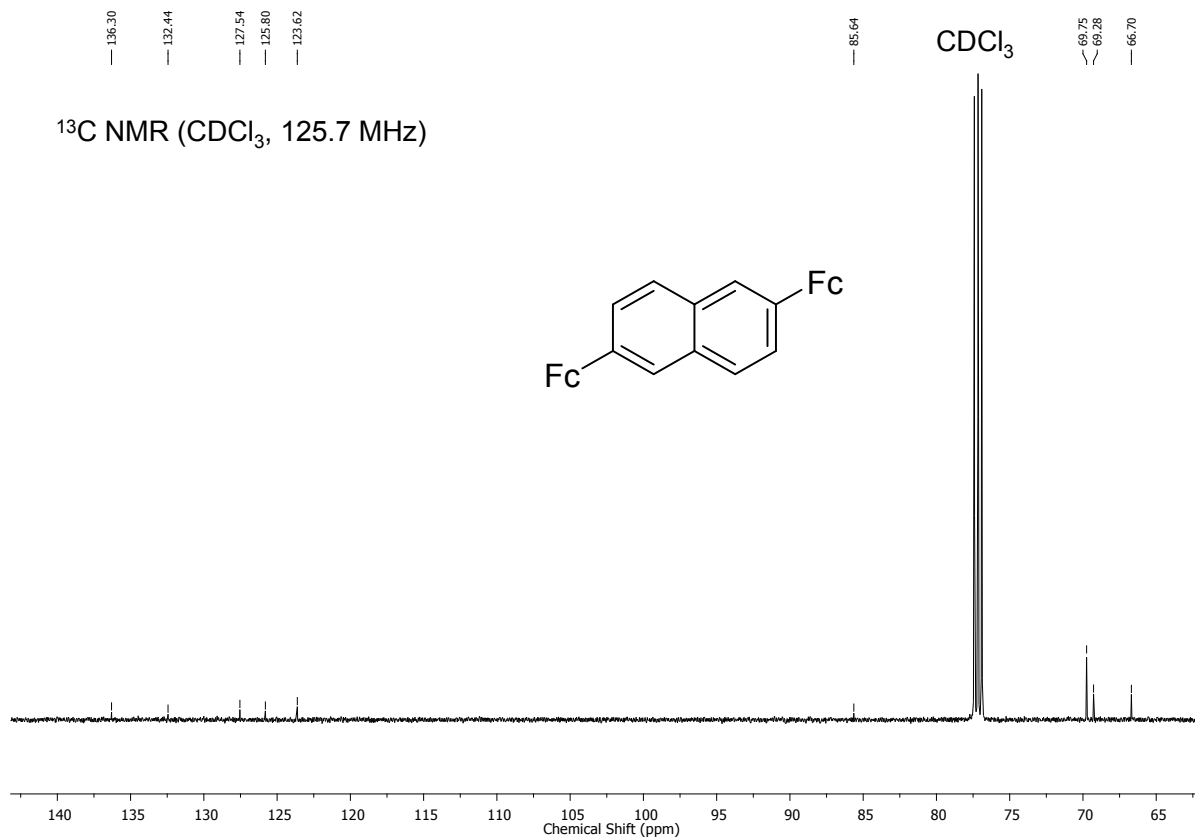

**Figure S157.** <sup>13</sup>C NMR spectrum of **7d** in CDCl<sub>3</sub>.

## References

- [1] M. Lee, B. M. Foxman, M. Rosenblum, *Organometallics* **1985**, *4*, 539–547.
- [2] N. Pagels, O. Albrecht, D. Görlitz, A. Y. Rogachev, M. H. Prosenc, J. Heck, *Chem. - A Eur. J.* **2011**, *17*, 4166–4176.
- [3] S. Trtica, M. H. Prosenc, M. Schmidt, J. Heck, O. Albrecht, D. Görlitz, F. Reuter, E. Rentschler, *Inorg. Chem.* **2010**, *49*, 1667–1673.
